# Supplementary material for: Admissibility Grid to Support the Decision for the Preferential Routing of Portuguese Endogenous Waste Biomass for the Production of Biogas, Advanced Biofuels, Electricity and Heat
Source: MDPI journal article supplement (doi:10.3390/biomass3040021), 2023-10-16
Supplement: s1 [file s1]

# Admissibility Grid to Support the Decision for the Preferential Routing of Portuguese Endogenous Waste Biomass for the Production of Biogas, Advanced Biofuels, Electricity and Heat

Ana T. Crujeira <sup>†</sup>, Maria A. Trancoso <sup>†</sup>, Ana Eusébio <sup>†</sup>, Ana Cristina Oliveira, Paula C. Passarinho, Mariana Abreu, Isabel P. Marques, Paula A. S. S. Marques, Susana Marques, Helena Albergaria, Filomena Pinto, Paula Costa, Rui André, Francisco Gírio and Patrícia Moura <sup>\*</sup>

LNEG—Laboratório Nacional de Energia e Geologia, I.P., Unidade de Bioenergia e Biorrefinarias, Estrada do Paço do Lumiar 22, 1649-038 Lisbon, Portugal; teresa.crujeira@lneg.pt (A.T.C.); maria.trancoso@gmail.com (M.A.T.); ana.eusebio@lneg.pt (A.E.); cristina.oliveira@lneg.pt (A.C.O.); paula.passarinho@lneg.pt (P.C.P.); mariana.abreu@lneg.pt (M.A.); isabel.paula@lneg.pt (I.P.M.); paula.marques@lneg.pt (P.A.S.S.M.); susana.marques@lneg.pt (S.M.); helena.albergaria@lneg.pt (H.A.); filomena.pinto@lneg.pt (F.P.); paula.costa@lneg.pt (P.C.); rui.andre@lneg.pt (R.A.); francisco.girio@lneg.pt (F.G.)

<sup>\*</sup> Correspondence: patricia.moura@lneg.pt; Tel.: +351-210924600

<sup>†</sup> These authors contributed equally to this work.

From the application of the Admissibility Grid for the *Solid Residues and Thick Sludges* matrix (Figure 1a) and the *Liquid sludges and fats* matrix (Figure 1b) it was concluded on the admissibility of each set of samples. The application of the Admissibility Grid for the *Solid Residues and Thick Sludges* matrix of the organic fractions of MSW and sludges from WWTP samples are presented in Figures S1-S5 whereas the application for the organic fractions from industrial wastes, sludges, and by-products samples are presented in Figures S6-S18. Figures S19-S24 present the application of the Admissibility Grid for the *Liquid sludges and fats* matrix for to the organic fractions of MSW, industrial wastes, sludges, and by-products samples.

Solid residues and thick sludges

Food waste (FW)

FW1

FW2

| 1 <sup>st</sup> step                                | TECHNOLOGIES → | T 1<br>Trans-<br>esterification | T 2<br>Anaerobic<br>Digestion | T 3<br>Alcoholic<br>Fermentation | T 4<br>Dark<br>Fermentation | T 5<br>Combustion    | T 6<br>Gasification | T 7<br>Pyrolysis |        | T 8<br>Hydrothermal<br>Liquefaction |
|-----------------------------------------------------|----------------|---------------------------------|-------------------------------|----------------------------------|-----------------------------|----------------------|---------------------|------------------|--------|-------------------------------------|
| Parameter                                           | Results        |                                 |                               |                                  |                             |                      |                     | Solid            | Liquid |                                     |
| Total Moisture (% w/w), ar                          | 70 – 86        |                                 |                               |                                  |                             | ≤ 40                 | ≤ 20                | ≤ 20             | ≤ 20   | 50 – 80                             |
| Oil (% w/w), ar                                     | 3.6 – 7.2      | ≥ 40                            | ≤ 30                          |                                  |                             |                      |                     |                  | ≥ 30   |                                     |
| Kjeldahl Nitrogen (% w/w), ar                       | 0.18 – 1.1     |                                 | ≥ 0.01                        |                                  |                             |                      |                     |                  |        |                                     |
| Total Volatile Solids, (% w/w), ar                  | 14 – 26        |                                 | ≥ 0.5                         |                                  |                             |                      |                     |                  |        |                                     |
| Carbon / Nitrogen ratio                             | 16             |                                 | 10 – 60                       |                                  |                             |                      |                     |                  |        |                                     |
| Total Hydrolysed Sugars<br>(as glucose) (% w/w), db | 31 – 40        |                                 |                               | ≥ 20                             | ≥ 25                        |                      |                     |                  |        |                                     |
| Ash at 815 °C (% w/w), db                           | 2.6 – 7.2      |                                 |                               |                                  |                             | ≤ 20                 | ≤ 20                | ≤ 20             |        | ≤ 20                                |
| Total Chloride (% w/w), db                          | 2.3            |                                 |                               |                                  |                             | ≤ 1                  | ≤ 1                 | ≤ 1              |        | ≤ 1                                 |
| Total Sulphur (% w/w), db                           | 0.22 – 0.27    |                                 |                               |                                  |                             | ≤ 2                  | ≤ 2                 | ≤ 2              |        | ≤ 2                                 |
| Higher Heating Value, (MJ/kg), db                   | 22 – 24        |                                 |                               |                                  |                             | ≥ 16                 | ≥ 16                | ≥ 16             |        |                                     |
| Bulk Density (kg/L), ar                             | 0.89 – 1.0     |                                 |                               |                                  |                             |                      | ≥ 0.12              |                  |        |                                     |
| Mean Particle Diameter, d <sub>50</sub> (mm), ar    | --             |                                 |                               |                                  |                             |                      | ≤ 80                | ≤ 2              |        | ≤ 10                                |
| Hydrogen / Carbon ratio                             | 0.13 – 0.14    |                                 |                               |                                  |                             |                      |                     |                  |        | 0.08 – 0.15                         |
| PRODUCTS →                                          |                | Biodiesel                       | Biogas                        | Bio-Ethanol                      | Bio-Hydrogen                | Electricity and Heat | Syngas              | Bio-oils         |        |                                     |
| Samples admissibility as received ⇨                 |                | ✗                               | ✓                             | ✓                                | ✓                           | ✗                    | ✗                   | ✗                | ✗      | ✗                                   |

→, not analysed because the characteristics of the sample were outside the scope of the analytical procedure

| 2 <sup>nd</sup> step                                             | Criteria to be satisfied after eventual adjustments of moisture* and particle dimension** |   |   |   |   |                          |                        |                        |                          |                          |
|------------------------------------------------------------------|-------------------------------------------------------------------------------------------|---|---|---|---|--------------------------|------------------------|------------------------|--------------------------|--------------------------|
| Total moisture, % (w/w), after adjustment *                      |                                                                                           |   |   |   |   | ≤ 40                     | ≤ 20                   | ≤ 20                   | ≤ 20                     | 50 – 80                  |
| R <sub>M</sub> = Total moisture, ar / Total moisture, adjusted * |                                                                                           |   |   |   |   | 1 < R <sub>M</sub> ≤ 1.5 | 1 < R <sub>M</sub> ≤ 3 | 1 < R <sub>M</sub> ≤ 3 | 1 < R <sub>M</sub> ≤ 2.5 | 0.6 ≤ R <sub>M</sub> < 1 |
| Mean Particle Diameter, d <sub>50</sub> (mm), ar                 |                                                                                           |   |   |   |   |                          | ≤ 80                   | ≤ 2                    |                          | ≤ 10                     |
| Samples admissibility after adjustment ⇨                         |                                                                                           | ✗ | ✓ | ✓ | ✓ | ✗                        | ✗                      | ✗                      | ✗                        | ✗                        |

\*, Natural drying (T5, T6, T7-Sol.), Decantation (T7-Liq.) or Humidification (T8); \*\*, Milling

**Figure S1.** Application of the Admissibility Grid to the organic fractions of MSW and sludges from WWTP samples within the *Solid Residues and Thick Sludges* matrix: Food waste (FW).

Solid residues and thick sludges

Green and brown wastes (GBW)





| 1 <sup>st</sup> step                                | TECHNOLOGIES →                     | T 1<br>Trans-<br>esterification | T 2<br>Anaerobic<br>Digestion | T 3<br>Alcoholic<br>Fermentation | T 4<br>Dark<br>Fermentation | T 5<br>Combustion       | T 6<br>Gasification | T 7<br>Pyrolysis | T 8<br>Hydrothermal<br>Liquefaction |
|-----------------------------------------------------|------------------------------------|---------------------------------|-------------------------------|----------------------------------|-----------------------------|-------------------------|---------------------|------------------|-------------------------------------|
| Parameter                                           | Results                            |                                 |                               |                                  |                             |                         |                     | Solid            | Liquid                              |
| Total Moisture (% w/w), ar                          | 33 – 72                            |                                 |                               |                                  |                             | ≤ 40                    | ≤ 20                | ≤ 20             | ≤ 20                                |
| Oil (% w/w), ar                                     | 1.4 – 1.6                          | ≥ 40                            | ≤ 30                          |                                  |                             |                         |                     |                  | ≥ 30                                |
| Kjeldahl Nitrogen (% w/w), ar                       | 0.73 – 0.81                        |                                 | ≥ 0.01                        |                                  |                             |                         |                     |                  |                                     |
| Total Volatile Solids, (% w/w), ar                  | 23 – 46                            |                                 | ≥ 0.5                         |                                  |                             |                         |                     |                  |                                     |
| Carbon / Nitrogen ratio                             | 20 – 36                            |                                 | 10 – 60                       |                                  |                             |                         |                     |                  |                                     |
| Total Hydrolysed Sugars<br>(as glucose) (% w/w), db | 12 – 22                            |                                 |                               | ≥ 20                             | ≥ 25                        |                         |                     |                  |                                     |
| Ash at 815 °C (% w/w), db                           | 14 – 30                            |                                 |                               |                                  |                             | ≤ 20                    | ≤ 20                | ≤ 20             | ≤ 20                                |
| Total Chloride (% w/w), db                          | 0.33 – 0.56                        |                                 |                               |                                  |                             | ≤ 1                     | ≤ 1                 | ≤ 1              | ≤ 1                                 |
| Total Sulphur (% w/w), db                           | 0.02 – 0.19                        |                                 |                               |                                  |                             | ≤ 2                     | ≤ 2                 | ≤ 2              | ≤ 2                                 |
| Higher Heating Value, (MJ/kg), db                   | 13 – 17                            |                                 |                               |                                  |                             | ≥ 16                    | ≥ 16                | ≥ 16             |                                     |
| Bulk Density (kg/L), ar                             | 0.09 – 0.20                        |                                 |                               |                                  |                             |                         | ≥ 0.12              |                  |                                     |
| Mean Particle Diameter, d <sub>50</sub> (mm), ar    | 5.2 <sup>+</sup> – 58 <sup>+</sup> |                                 |                               |                                  |                             |                         | ≤ 80                | ≤ 2              | ≤ 10                                |
| Hydrogen / Carbon ratio                             | 0.08 – 0.10                        |                                 |                               |                                  |                             |                         |                     |                  | 0.08 – 0.15                         |
| PRODUCTS →                                          |                                    | Biodiesel                       | Biogas                        | Bio-Ethanol                      | Bio-Hydrogen                | Electricity<br>and Heat | Syngas              | Bio-oils         |                                     |
| Samples admissibility as received ⇨                 |                                    | ✗                               | ✓                             | ✓                                | ✗                           | ✓                       | ✗                   | ✗                | ✗                                   |

<sup>+</sup>, values determined in pre-dried samples

| 2 <sup>nd</sup> step                                             | Criteria to be satisfied after eventual adjustments of moisture* and particle dimension** |
|------------------------------------------------------------------|-------------------------------------------------------------------------------------------|
| Total moisture, % (w/w), after adjustment *                      | ≤ 40                                                                                      |
| R <sub>M</sub> = Total moisture, ar / Total moisture, adjusted * | 1 < R <sub>M</sub> ≤ 1.5                                                                  |
| Mean Particle Diameter, d <sub>50</sub> (mm), ar                 | ≤ 80                                                                                      |
| Samples admissibility after adjustment ⇨                         | ✗                                                                                         |

\* , Natural drying (T5, T6, T7-Sol.), Decantation (T7-Liq.) or Humidification (T8); \*\* , Milling

**Figure S2.** Application of the Admissibility Grid to the organic fractions of MSW and sludges from WWTP samples within the *Solid Residues and Thick Sludges* matrix: Green and brown wastes (GBW).

Solid residues and thick sludges

Fraction obtained after mechanical and biological treatment (MBT)

| 1 <sup>st</sup> step                             |                                     | TECHNOLOGIES →                  |                               |                                  |                             |                      |                     |                  |        |                                     |
|--------------------------------------------------|-------------------------------------|---------------------------------|-------------------------------|----------------------------------|-----------------------------|----------------------|---------------------|------------------|--------|-------------------------------------|
|                                                  |                                     | T 1<br>Trans-<br>esterification | T 2<br>Anaerobic<br>Digestion | T 3<br>Alcoholic<br>Fermentation | T 4<br>Dark<br>Fermentation | T 5<br>Combustion    | T 6<br>Gasification | T 7<br>Pyrolysis |        | T 8<br>Hydrothermal<br>Liquefaction |
| Parameter                                        | Results                             |                                 |                               |                                  |                             |                      |                     | Solid            | Liquid |                                     |
| Total Moisture (% w/w), ar                       | 5.1 – 34                            |                                 |                               |                                  |                             | ≤ 40                 | ≤ 20                | ≤ 20             | ≤ 20   | 50 – 80                             |
| Oil (% w/w), ar                                  | 0.48 – 3.5                          | ≥ 40                            | ≤ 30                          |                                  |                             |                      |                     |                  | ≥ 30   |                                     |
| Kjeldahl Nitrogen (% w/w), ar                    | 0.59 – 1.7                          |                                 | ≥ 0.01                        |                                  |                             |                      |                     |                  |        |                                     |
| Total Volatile Solids, (% w/w), ar               | 18 – 44                             |                                 | ≥ 0.5                         |                                  |                             |                      |                     |                  |        |                                     |
| Carbon / Nitrogen ratio                          | 15 – 24                             |                                 | 10 – 60                       |                                  |                             |                      |                     |                  |        |                                     |
| Total Hydrolysed Sugars (as glucose) (% w/w), db | 6.1 – 18                            |                                 |                               | ≥ 20                             | ≥ 25                        |                      |                     |                  |        |                                     |
| Ash at 815 °C (% w/w), db                        | 37 – 77                             |                                 |                               |                                  |                             | ≤ 20                 | ≤ 20                | ≤ 20             |        | ≤ 20                                |
| Total Chloride (% w/w), db                       | 0.20 – 0.69                         |                                 |                               |                                  |                             | ≤ 1                  | ≤ 1                 | ≤ 1              |        | ≤ 1                                 |
| Total Sulphur (% w/w), db                        | 0.12 – 0.42                         |                                 |                               |                                  |                             | ≤ 2                  | ≤ 2                 | ≤ 2              |        | ≤ 2                                 |
| Higher Heating Value, (MJ/kg), db                | 4.7 – 12                            |                                 |                               |                                  |                             | ≥ 16                 | ≥ 16                | ≥ 16             |        |                                     |
| Bulk Density (kg/L), ar                          | 0.40 – 0.87                         |                                 |                               |                                  |                             |                      | ≥ 0.12              |                  |        |                                     |
| Mean Particle Diameter, d <sub>50</sub> (mm), ar | 1.6 <sup>+</sup> – 6.9 <sup>+</sup> |                                 |                               |                                  |                             |                      | ≤ 80                | ≤ 2              |        | ≤ 10                                |
| Hydrogen / Carbon ratio                          | 0.08 – 0.10                         |                                 |                               |                                  |                             |                      |                     |                  |        | 0.08 – 0.15                         |
| PRODUCTS →                                       |                                     | Biodiesel                       | Biogas                        | Bio-Ethanol                      | Bio-Hydrogen                | Electricity and Heat | Syngas              | Bio-oils         |        |                                     |
| Samples admissibility as received ⇨              |                                     | ✗                               | ✓                             | ✗                                | ✗                           | ✗                    | ✗                   | ✗                | ✗      | ✗                                   |

<sup>+</sup>, values determined in pre-dried samples

| 2 <sup>nd</sup> step                                             |  | Criteria to be satisfied after eventual adjustments of moisture* and particle dimension** |   |   |   |                          |                        |                        |                          |                          |
|------------------------------------------------------------------|--|-------------------------------------------------------------------------------------------|---|---|---|--------------------------|------------------------|------------------------|--------------------------|--------------------------|
| Total moisture, % (w/w), after adjustment *                      |  |                                                                                           |   |   |   | ≤ 40                     | ≤ 20                   | ≤ 20                   | ≤ 20                     | 50 – 80                  |
| R <sub>M</sub> = Total moisture, ar / Total moisture, adjusted * |  |                                                                                           |   |   |   | 1 < R <sub>M</sub> ≤ 1.5 | 1 < R <sub>M</sub> ≤ 3 | 1 < R <sub>M</sub> ≤ 3 | 1 < R <sub>M</sub> ≤ 2.5 | 0.6 ≤ R <sub>M</sub> < 1 |
| Mean Particle Diameter, d <sub>50</sub> (mm), ar                 |  |                                                                                           |   |   |   |                          | ≤ 80                   | ≤ 2                    |                          | ≤ 10                     |
| Samples admissibility after adjustment ⇨                         |  | ✗                                                                                         | ✓ | ✗ | ✗ | ✗                        | ✗                      | ✗                      | ✗                        | ✗                        |

<sup>\*</sup>, Natural drying (T5, T6, T7-Sol.), Decantation (T7-Liq.) or Humidification (T8); <sup>\*\*</sup>, Milling

**Figure S3.** Application of the Admissibility Grid to the organic fractions of MSW and sludges from WWTP samples within the *Solid Residues and Thick Sludges* matrix: Fraction obtained after mechanical and biological treatment (MBT).



Solid residues and thick sludges

# Fraction obtained after mechanical treatment (MT)

| 1 <sup>st</sup> step                                |                                   | TECHNOLOGIES →                 |                              |                                 |                            |                      |                    |                 |        |                                    |
|-----------------------------------------------------|-----------------------------------|--------------------------------|------------------------------|---------------------------------|----------------------------|----------------------|--------------------|-----------------|--------|------------------------------------|
|                                                     |                                   | T1<br>Trans-<br>esterification | T2<br>Anaerobic<br>Digestion | T3<br>Alcoholic<br>Fermentation | T4<br>Dark<br>Fermentation | T5<br>Combustion     | T6<br>Gasification | T7<br>Pyrolysis |        | T8<br>Hydrothermal<br>Liquefaction |
| Parameter                                           | Results                           |                                |                              |                                 |                            |                      |                    | Solid           | Liquid |                                    |
| Total Moisture (% w/w), ar                          | 7.4 – 56                          |                                |                              |                                 |                            | ≤ 40                 | ≤ 20               | ≤ 20            | ≤ 20   | 50 – 80                            |
| Oil (% w/w), ar                                     | 0.89 – 4.1                        | ≥ 40                           | ≤ 30                         |                                 |                            |                      |                    |                 | ≥ 30   |                                    |
| Kjeldahl Nitrogen (% w/w), ar                       | 0.52 – 1.4                        |                                | ≥ 0.01                       |                                 |                            |                      |                    |                 |        |                                    |
| Total Volatile Solids, (% w/w), ar                  | 21 – 46                           |                                | ≥ 0.5                        |                                 |                            |                      |                    |                 |        |                                    |
| Carbon / Nitrogen ratio                             | 17 – 32                           |                                | 10 – 60                      |                                 |                            |                      |                    |                 |        |                                    |
| Total Hydrolysed Sugars<br>(as glucose) (% w/w), db | 13 – 30                           |                                |                              | ≥ 20                            | ≥ 25                       |                      |                    |                 |        |                                    |
| Ash at 815 °C (% w/w), db                           | 32 – 48                           |                                |                              |                                 |                            | ≤ 20                 | ≤ 20               | ≤ 20            |        | ≤ 20                               |
| Total Chloride (% w/w), db                          | 0.31 – 0.85                       |                                |                              |                                 |                            | ≤ 1                  | ≤ 1                | ≤ 1             |        | ≤ 1                                |
| Total Sulphur (% w/w), db                           | 0.20 – 0.32                       |                                |                              |                                 |                            | ≤ 2                  | ≤ 2                | ≤ 2             |        | ≤ 2                                |
| Higher Heating Value, (MJ/kg), db                   | 9.8 – 15                          |                                |                              |                                 |                            | ≥ 16                 | ≥ 16               | ≥ 16            |        |                                    |
| Bulk Density (kg/L), ar                             | 0.30 – 0.51                       |                                |                              |                                 |                            |                      | ≥ 0.12             |                 |        |                                    |
| Mean Particle Diameter, d <sub>50</sub> (mm), ar    | 10 <sup>+</sup> – 29 <sup>+</sup> |                                |                              |                                 |                            |                      | ≤ 80               | ≤ 2             |        | ≤ 10                               |
| Hydrogen / Carbon ratio                             | 0.11 – 0.13                       |                                |                              |                                 |                            |                      |                    |                 |        | 0.08 – 0.15                        |
| PRODUCTS →                                          |                                   | Biodiesel                      | Biogas                       | Bio-Ethanol                     | Bio-Hydrogen               | Electricity and Heat | Syngas             | Bio-oils        |        |                                    |
| Samples admissibility as received ⇨                 |                                   | ✗                              | ✓                            | ✓                               | ✓                          | ✗                    | ✗                  | ✗               | ✗      | ✗                                  |

†, values determined in pre-dried samples

| 2 <sup>nd</sup> step                                             |  | Criteria to be satisfied after eventual adjustments of moisture* and particle dimension** |   |   |   |                          |                        |                        |                          |                          |
|------------------------------------------------------------------|--|-------------------------------------------------------------------------------------------|---|---|---|--------------------------|------------------------|------------------------|--------------------------|--------------------------|
| Total moisture, % (w/w), after adjustment *                      |  |                                                                                           |   |   |   | ≤ 40                     | ≤ 20                   | ≤ 20                   | ≤ 20                     | 50 – 80                  |
| R <sub>M</sub> = Total moisture, ar / Total moisture, adjusted * |  |                                                                                           |   |   |   | 1 < R <sub>M</sub> ≤ 1.5 | 1 < R <sub>M</sub> ≤ 3 | 1 < R <sub>M</sub> ≤ 3 | 1 < R <sub>M</sub> ≤ 2.5 | 0.6 ≤ R <sub>M</sub> < 1 |
| Mean Particle Diameter, d <sub>50</sub> (mm), ar                 |  |                                                                                           |   |   |   |                          | ≤ 80                   | ≤ 2                    |                          | ≤ 10                     |
| Samples admissibility after adjustment ⇨                         |  | ✗                                                                                         | ✓ | ✓ | ✓ | ✗                        | ✗                      | ✗                      | ✗                        | ✗                        |

\*, Natural drying (T5, T6, T7-Sol.), Decantation (T7-Liq.) or Humidification (T8); \*\*, Milling

**Figure S4.** Application of the Admissibility Grid to the organic fractions of MSW and sludges from WWTP samples within the *Solid Residues and Thick Sludges* matrix: Fraction obtained after mechanical treatment (MT).

Solid residues and thick sludges

Sewage sludge (SS)

| 1 <sup>st</sup> step                                |             | TECHNOLOGIES →                  |                               |                                  |                             |                         |                     |                  |        |                                     |
|-----------------------------------------------------|-------------|---------------------------------|-------------------------------|----------------------------------|-----------------------------|-------------------------|---------------------|------------------|--------|-------------------------------------|
|                                                     |             | T 1<br>Trans-<br>esterification | T 2<br>Anaerobic<br>Digestion | T 3<br>Alcoholic<br>Fermentation | T 4<br>Dark<br>Fermentation | T 5<br>Combustion       | T 6<br>Gasification | T 7<br>Pyrolysis |        | T 8<br>Hydrothermal<br>Liquefaction |
| Parameter                                           | Results     |                                 |                               |                                  |                             |                         |                     | Solid            | Liquid |                                     |
| Total Moisture (% w/w), ar                          | 80          |                                 |                               |                                  |                             | ≤ 40                    | ≤ 20                | ≤ 20             | ≤ 20   | 50 – 80                             |
| Oil (% w/w), ar                                     | 0.60 – 0.92 | ≥ 40                            | ≤ 30                          |                                  |                             |                         |                     |                  | ≥ 30   |                                     |
| Kjeldahl Nitrogen (% w/w), ar                       | 0.43 – 1.7  |                                 | ≥ 0.01                        |                                  |                             |                         |                     |                  |        |                                     |
| Total Volatile Solids, (% w/w), ar                  | 16          |                                 | ≥ 0.5                         |                                  |                             |                         |                     |                  |        |                                     |
| Carbon / Nitrogen ratio                             | 5.5 – 5.7   |                                 | 10 – 60                       |                                  |                             |                         |                     |                  |        |                                     |
| Total Hydrolysed Sugars<br>(as glucose) (% w/w), db | 11 – 13     |                                 |                               | ≥ 20                             | ≥ 25                        |                         |                     |                  |        |                                     |
| Ash at 815 °C (% w/w), db                           | 17 – 19     |                                 |                               |                                  |                             | ≤ 20                    | ≤ 20                | ≤ 20             |        | ≤ 20                                |
| Total Chloride (% w/w), db                          | 0.32 – 0.40 |                                 |                               |                                  |                             | ≤ 1                     | ≤ 1                 | ≤ 1              |        | ≤ 1                                 |
| Total Sulphur (% w/w), db                           | 0.87 – 1.0  |                                 |                               |                                  |                             | ≤ 2                     | ≤ 2                 | ≤ 2              |        | ≤ 2                                 |
| Higher Heating Value, (MJ/kg), db                   | 19 – 20     |                                 |                               |                                  |                             | ≥ 16                    | ≥ 16                | ≥ 16             |        |                                     |
| Bulk Density (kg/L), ar                             | 0.62 – 0.66 |                                 |                               |                                  |                             |                         | ≥ 0.12              |                  |        |                                     |
| Mean Particle Diameter, d <sub>50</sub> (mm), ar    | --          |                                 |                               |                                  |                             |                         | ≤ 80                | ≤ 2              |        | ≤ 10                                |
| Hydrogen / Carbon ratio                             | 0.12 – 0.13 |                                 |                               |                                  |                             |                         |                     |                  |        | 0.08 – 0.15                         |
| PRODUCTS →                                          |             | Biodiesel                       | Biogas                        | Bio-Ethanol                      | Bio-Hydrogen                | Electricity<br>and Heat | Syngas              | Bio-oils         |        |                                     |
| Samples admissibility as received ⇨                 |             | ✗                               | ✗                             | ✗                                | ✗                           | ✗                       | ✗                   | ✗                | ✗      | ✗                                   |

--, not analysed because the characteristics of the sample were outside the scope of the analytical procedure

| 2 <sup>nd</sup> step                                             |  | Criteria to be satisfied after eventual adjustments of moisture* and particle dimension** |   |   |   |                          |                        |                        |                          |                          |
|------------------------------------------------------------------|--|-------------------------------------------------------------------------------------------|---|---|---|--------------------------|------------------------|------------------------|--------------------------|--------------------------|
| Total moisture, % (w/w), after adjustment *                      |  |                                                                                           |   |   |   | ≤ 40                     | ≤ 20                   | ≤ 20                   | ≤ 20                     | 50 – 80                  |
| R <sub>M</sub> = Total moisture, ar / Total moisture, adjusted * |  |                                                                                           |   |   |   | 1 < R <sub>M</sub> ≤ 1.5 | 1 < R <sub>M</sub> ≤ 3 | 1 < R <sub>M</sub> ≤ 3 | 1 < R <sub>M</sub> ≤ 2.5 | 0.6 ≤ R <sub>M</sub> < 1 |
| Mean Particle Diameter, d <sub>50</sub> (mm), ar                 |  |                                                                                           |   |   |   |                          | ≤ 80                   | ≤ 2                    |                          | ≤ 10                     |
| Samples admissibility after adjustment ⇨                         |  | ✗                                                                                         | ✗ | ✗ | ✗ | ✗                        | ✗                      | ✗                      | ✗                        | ✓                        |

\*, Natural drying (T5, T6, T7-Sol.), Decantation (T7-Liq.) or Humidification (T8); \*\*, Milling

**Figure S5.** Application of the Admissibility Grid to the organic fractions of MSW and sludges from WWTP samples within the *Solid Residues and Thick Sludges* matrix: Sewage sludge (SS).

Solid residues and thick sludges

Olive pomace (OP)

OP1

OP2

OP3

| 1 <sup>st</sup> step                             |             | TECHNOLOGIES →                  |                               |                                  |                             |                      |                     |                  |        |                                     |
|--------------------------------------------------|-------------|---------------------------------|-------------------------------|----------------------------------|-----------------------------|----------------------|---------------------|------------------|--------|-------------------------------------|
|                                                  |             | T 1<br>Trans-<br>esterification | T 2<br>Anaerobic<br>Digestion | T 3<br>Alcoholic<br>Fermentation | T 4<br>Dark<br>Fermentation | T 5<br>Combustion    | T 6<br>Gasification | T 7<br>Pyrolysis |        | T 8<br>Hydrothermal<br>Liquefaction |
| Parameter                                        | Results     |                                 |                               |                                  |                             |                      |                     | Solid            | Liquid |                                     |
| Total Moisture (% w/w), ar                       | 13 – 62     |                                 |                               |                                  |                             | ≤ 40                 | ≤ 20                | ≤ 20             | ≤ 20   | 50 – 80                             |
| Oil (% w/w), ar                                  | 0.83 – 5.7  | ≥ 40                            | ≤ 30                          |                                  |                             |                      |                     |                  | ≥ 30   |                                     |
| Kjeldahl Nitrogen (% w/w), ar                    | 0.22 – 1.7  |                                 | ≥ 0.01                        |                                  |                             |                      |                     |                  |        |                                     |
| Total Volatile Solids, (% w/w), ar               | 36 – 77     |                                 | ≥ 0.5                         |                                  |                             |                      |                     |                  |        |                                     |
| Carbon / Nitrogen ratio                          | 21 – 54     |                                 | 10 – 60                       |                                  |                             |                      |                     |                  |        |                                     |
| Total Hydrolysed Sugars (as glucose) (% w/w), db | 23 – 28     |                                 |                               | ≥ 20                             | ≥ 25                        |                      |                     |                  |        |                                     |
| Ash at 815 °C (% w/w), db                        | 4.0 – 9.3   |                                 |                               |                                  |                             | ≤ 20                 | ≤ 20                | ≤ 20             |        | ≤ 20                                |
| Total Chloride (% w/w), db                       | <0.14–0.35  |                                 |                               |                                  |                             | ≤ 1                  | ≤ 1                 | ≤ 1              |        | ≤ 1                                 |
| Total Sulphur (% w/w), db                        | 0.10 – 0.11 |                                 |                               |                                  |                             | ≤ 2                  | ≤ 2                 | ≤ 2              |        | ≤ 2                                 |
| Higher Heating Value, (MJ/kg), db                | 20 – 23     |                                 |                               |                                  |                             | ≥ 16                 | ≥ 16                | ≥ 16             |        |                                     |
| Bulk Density (kg/L), ar                          | 0.64 – 1.1  |                                 |                               |                                  |                             |                      | ≥ 0.12              |                  |        |                                     |
| Mean Particle Diameter, d <sub>50</sub> (mm), ar | --          |                                 |                               |                                  |                             |                      | ≤ 80                | ≤ 2              |        | ≤ 10                                |
| Hydrogen / Carbon ratio                          | 0.10 – 0.13 |                                 |                               |                                  |                             |                      |                     |                  |        | 0.08 – 0.15                         |
| PRODUCTS →                                       |             | Biodiesel                       | Biogas                        | Bio-Ethanol                      | Bio-Hydrogen                | Electricity and Heat | Syngas              | Bio-oils         |        |                                     |
| Samples admissibility as received ⇨              |             | ✗                               | ✓                             | ✓                                | ✓                           | ✓                    | ✓                   | ✓                | ✗      | ✓                                   |

--, not analysed because the characteristics of the sample were outside the scope of the analytical procedure

| 2 <sup>nd</sup> step                                             |  | Criteria to be satisfied after eventual adjustments of moisture* and particle dimension** |   |   |   |                          |                        |                        |                          |                          |
|------------------------------------------------------------------|--|-------------------------------------------------------------------------------------------|---|---|---|--------------------------|------------------------|------------------------|--------------------------|--------------------------|
| Total moisture, % (w/w), after adjustment *                      |  |                                                                                           |   |   |   | ≤ 40                     | ≤ 20                   | ≤ 20                   | ≤ 20                     | 50 – 80                  |
| R <sub>M</sub> = Total moisture, ar / Total moisture, adjusted * |  |                                                                                           |   |   |   | 1 < R <sub>M</sub> ≤ 1.5 | 1 < R <sub>M</sub> ≤ 3 | 1 < R <sub>M</sub> ≤ 3 | 1 < R <sub>M</sub> ≤ 2.5 | 0.6 ≤ R <sub>M</sub> < 1 |
| Mean Particle Diameter, d <sub>50</sub> (mm), ar                 |  |                                                                                           |   |   |   |                          | ≤ 80                   | ≤ 2                    |                          | ≤ 10                     |
| Samples admissibility after adjustment ⇨                         |  | ✗                                                                                         | ✓ | ✓ | ✓ | ✓                        | ✓                      | ✓                      | ✗                        | ✓                        |

\*, Natural drying (T5, T6, T7-Sol.), Decantation (T7-Liq.) or Humidification (T8); \*\*, Milling

**Figure S6.** Application of the Admissibility Grid to the organic fractions from industrial wastes, sludges, and by-products samples within the *Solid Residues and Thick Sludges* matrix: Olive pomace (OP).

Solid residues and thick sludges

Olive tree leaves (OL)

OL1

OL2

| 1 <sup>st</sup> step                             | TECHNOLOGIES →                      | T 1<br>Trans-<br>esterification | T 2<br>Anaerobic<br>Digestion | T 3<br>Alcoholic<br>Fermentation | T 4<br>Dark<br>Fermentation | T 5<br>Combustion    | T 6<br>Gasification | T 7<br>Pyrolysis |        | T 8<br>Hydrothermal<br>Liquefaction |
|--------------------------------------------------|-------------------------------------|---------------------------------|-------------------------------|----------------------------------|-----------------------------|----------------------|---------------------|------------------|--------|-------------------------------------|
| Parameter                                        | Results                             |                                 |                               |                                  |                             |                      |                     | Solid            | Liquid |                                     |
| Total Moisture (% w/w), ar                       | 22 – 44                             |                                 |                               |                                  |                             | ≤ 40                 | ≤ 20                | ≤ 20             | ≤ 20   | 50 – 80                             |
| Oil (% w/w), ar                                  | 3.0 – 7.7                           | ≥ 40                            | ≤ 30                          |                                  |                             |                      |                     |                  | ≥ 30   |                                     |
| Kjeldahl Nitrogen (% w/w), ar                    | 0.63 – 0.81                         |                                 | ≥ 0.01                        |                                  |                             |                      |                     |                  |        |                                     |
| Total Volatile Solids, (% w/w), ar               | 52 – 69                             |                                 | ≥ 0.5                         |                                  |                             |                      |                     |                  |        |                                     |
| Carbon / Nitrogen ratio                          | 46 – 48                             |                                 | 10 – 60                       |                                  |                             |                      |                     |                  |        |                                     |
| Total Hydrolysed Sugars (as glucose) (% w/w), db | 20 – 23                             |                                 |                               | ≥ 20                             | ≥ 25                        |                      |                     |                  |        |                                     |
| Ash at 815 °C (% w/w), db                        | 6.7 – 10                            |                                 |                               |                                  |                             | ≤ 20                 | ≤ 20                | ≤ 20             |        | ≤ 20                                |
| Total Chloride (% w/w), db                       | < 0.14                              |                                 |                               |                                  |                             | ≤ 1                  | ≤ 1                 | ≤ 1              |        | ≤ 1                                 |
| Total Sulphur (% w/w), db                        | 0.11 – 0.12                         |                                 |                               |                                  |                             | ≤ 2                  | ≤ 2                 | ≤ 2              |        | ≤ 2                                 |
| Higher Heating Value, (MJ/kg), db                | 22 – 23                             |                                 |                               |                                  |                             | ≥ 16                 | ≥ 16                | ≥ 16             |        |                                     |
| Bulk Density (kg/L), ar                          | 0.11 – 0.12                         |                                 |                               |                                  |                             |                      | ≥ 0.12              |                  |        |                                     |
| Mean Particle Diameter, d <sub>50</sub> (mm), ar | 2.5 <sup>†</sup> – 7.7 <sup>†</sup> |                                 |                               |                                  |                             |                      | ≤ 80                | ≤ 2              |        | ≤ 10                                |
| Hydrogen / Carbon ratio                          | 0.12                                |                                 |                               |                                  |                             |                      |                     |                  |        | 0.08 – 0.15                         |
| PRODUCTS →                                       |                                     | Biodiesel                       | Biogas                        | Bio-Ethanol                      | Bio-Hydrogen                | Electricity and Heat | Syngas              | Bio-oils         |        |                                     |
| Samples admissibility as received ⇨              |                                     | ✗                               | ✓                             | ✓                                | ✗                           | ✗                    | ✗                   | ✗                | ✗      | ✗                                   |

†, values determined in pre-dried samples

| 2 <sup>nd</sup> step                                             | Criteria to be satisfied after eventual adjustments of moisture* and particle dimension** |
|------------------------------------------------------------------|-------------------------------------------------------------------------------------------|
| Total moisture, % (w/w), after adjustment *                      |                                                                                           |
| R <sub>M</sub> = Total moisture, ar / Total moisture, adjusted * |                                                                                           |
| Mean Particle Diameter, d <sub>50</sub> (mm), ar                 |                                                                                           |
| Samples admissibility after adjustment ⇨                         |                                                                                           |

\*, Natural drying (T5, T6, T7-Sol.), Decantation (T7-Liq.) or Humidification (T8); \*\*, Milling

**Figure S7.** Application of the Admissibility Grid to the organic fractions from industrial wastes, sludges, and by-products samples within the *Solid Residues and Thick Sludges* matrix: Olive leaves (OL).

Solid residues and thick sludges

Olive stone (OS)

OS

| 1 <sup>st</sup> step                                |                  | TECHNOLOGIES →                  |                               |                                  |                             |                      |                     |                  |        |                                     |
|-----------------------------------------------------|------------------|---------------------------------|-------------------------------|----------------------------------|-----------------------------|----------------------|---------------------|------------------|--------|-------------------------------------|
|                                                     |                  | T 1<br>Trans-<br>esterification | T 2<br>Anaerobic<br>Digestion | T 3<br>Alcoholic<br>Fermentation | T 4<br>Dark<br>Fermentation | T 5<br>Combustion    | T 6<br>Gasification | T 7<br>Pyrolysis |        | T 8<br>Hydrothermal<br>Liquefaction |
| Parameter                                           | Results          |                                 |                               |                                  |                             |                      |                     | Solid            | Liquid |                                     |
| Total Moisture (% w/w), ar                          | 23               |                                 |                               |                                  |                             | ≤ 40                 | ≤ 20                | ≤ 20             | ≤ 20   | 50 – 80                             |
| Oil (% w/w), ar                                     | 3.7              | ≥ 40                            | ≤ 30                          |                                  |                             |                      |                     |                  | ≥ 30   |                                     |
| Kjeldahl Nitrogen (% w/w), ar                       | 0.28             |                                 | ≥ 0.01                        |                                  |                             |                      |                     |                  |        |                                     |
| Total Volatile Solids, (% w/w), ar                  | 76               |                                 | ≥ 0.5                         |                                  |                             |                      |                     |                  |        |                                     |
| Carbon / Nitrogen ratio                             | 97               |                                 | 10 – 60                       |                                  |                             |                      |                     |                  |        |                                     |
| Total Hydrolysed Sugars<br>(as glucose) (% w/w), db | 18               |                                 |                               | ≥ 20                             | ≥ 25                        |                      |                     |                  |        |                                     |
| Ash at 815 °C (% w/w), db                           | 1.2              |                                 |                               |                                  |                             | ≤ 20                 | ≤ 20                | ≤ 20             |        | ≤ 20                                |
| Total Chloride (% w/w), db                          | < 0.14           |                                 |                               |                                  |                             | ≤ 1                  | ≤ 1                 | ≤ 1              |        | ≤ 1                                 |
| Total Sulphur (% w/w), db                           | 0.04             |                                 |                               |                                  |                             | ≤ 2                  | ≤ 2                 | ≤ 2              |        | ≤ 2                                 |
| Higher Heating Value, (MJ/kg), db                   | 22               |                                 |                               |                                  |                             | ≥ 16                 | ≥ 16                | ≥ 16             |        |                                     |
| Bulk Density (kg/L), ar                             | 0.67             |                                 |                               |                                  |                             |                      | ≥ 0.12              |                  |        |                                     |
| Mean Particle Diameter, d <sub>50</sub> (mm), ar    | 1.5 <sup>†</sup> |                                 |                               |                                  |                             |                      | ≤ 80                | ≤ 2              |        | ≤ 10                                |
| Hydrogen / Carbon ratio                             | 0.11             |                                 |                               |                                  |                             |                      |                     |                  |        | 0.08 – 0.15                         |
| PRODUCTS →                                          |                  | Biodiesel                       | Biogas                        | Bio-Ethanol                      | Bio-Hydrogen                | Electricity and Heat | Syngas              | Bio-oils         |        |                                     |
| Samples admissibility as received ⇨                 |                  | ×                               | ×                             | ×                                | ×                           | ✓                    | ×                   | ×                | ×      | ×                                   |

<sup>†</sup>, values determined in pre-dried samples

| 2 <sup>nd</sup> step                                             |  | Criteria to be satisfied after eventual adjustments of moisture* and particle dimension** |   |   |   |                          |                        |                        |                          |                          |
|------------------------------------------------------------------|--|-------------------------------------------------------------------------------------------|---|---|---|--------------------------|------------------------|------------------------|--------------------------|--------------------------|
| Total moisture, % (w/w), after adjustment *                      |  |                                                                                           |   |   |   | ≤ 40                     | ≤ 20                   | ≤ 20                   | ≤ 20                     | 50 – 80                  |
| R <sub>M</sub> = Total moisture, ar / Total moisture, adjusted * |  |                                                                                           |   |   |   | 1 < R <sub>M</sub> ≤ 1.5 | 1 < R <sub>M</sub> ≤ 3 | 1 < R <sub>M</sub> ≤ 3 | 1 < R <sub>M</sub> ≤ 2.5 | 0.6 ≤ R <sub>M</sub> < 1 |
| Mean Particle Diameter, d <sub>50</sub> (mm), ar                 |  |                                                                                           |   |   |   |                          | ≤ 80                   | ≤ 2                    |                          | ≤ 10                     |
| Samples admissibility after adjustment ⇨                         |  | ×                                                                                         | × | × | × | ✓                        | ✓                      | ✓                      | ×                        | ×                        |

\*, Natural drying (T5, T6, T7-Sol.), Decantation (T7-Liq.) or Humidification (T8); \*\*, Milling

**Figure S8.** Application of the Admissibility Grid to the organic fractions from industrial wastes, sludges, and by-products samples within the *Solid Residues and Thick Sludges* matrix: Olive stone (OS).



Solid residues and thick sludges

# Chestnut shells (CS)

| 1 <sup>st</sup> step                             |                                     | TECHNOLOGIES →                  |                               |                                  |                             |                      |                     |                  |        |                                     |
|--------------------------------------------------|-------------------------------------|---------------------------------|-------------------------------|----------------------------------|-----------------------------|----------------------|---------------------|------------------|--------|-------------------------------------|
|                                                  |                                     | T 1<br>Trans-<br>esterification | T 2<br>Anaerobic<br>Digestion | T 3<br>Alcoholic<br>Fermentation | T 4<br>Dark<br>Fermentation | T 5<br>Combustion    | T 6<br>Gasification | T 7<br>Pyrolysis |        | T 8<br>Hydrothermal<br>Liquefaction |
| Parameter                                        | Results                             |                                 |                               |                                  |                             |                      |                     | Solid            | Liquid |                                     |
| Total Moisture (% w/w), ar                       | 64 – 80                             |                                 |                               |                                  |                             | ≤ 40                 | ≤ 20                | ≤ 20             | ≤ 20   | 50 – 80                             |
| Oil (% w/w), ar                                  | 0.29 – 0.80                         | ≥ 40                            | ≤ 30                          |                                  |                             |                      |                     |                  | ≥ 30   |                                     |
| Kjeldahl Nitrogen (% w/w), ar                    | 0.21 – 0.49                         |                                 | ≥ 0.01                        |                                  |                             |                      |                     |                  |        |                                     |
| Total Volatile Solids, (% w/w), ar               | 20 – 35                             |                                 | ≥ 0.5                         |                                  |                             |                      |                     |                  |        |                                     |
| Carbon / Nitrogen ratio                          | 42 – 65                             |                                 | 10 – 60                       |                                  |                             |                      |                     |                  |        |                                     |
| Total Hydrolysed Sugars (as glucose) (% w/w), db | 31 – 36                             |                                 |                               | ≥ 20                             | ≥ 25                        |                      |                     |                  |        |                                     |
| Ash at 815 °C (% w/w), db                        | 1.5 – 2.5                           |                                 |                               |                                  |                             | ≤ 20                 | ≤ 20                | ≤ 20             |        | ≤ 20                                |
| Total Chloride (% w/w), db                       | < 0.14                              |                                 |                               |                                  |                             | ≤ 1                  | ≤ 1                 | ≤ 1              |        | ≤ 1                                 |
| Total Sulphur (% w/w), db                        | 0.07–0.09                           |                                 |                               |                                  |                             | ≤ 2                  | ≤ 2                 | ≤ 2              |        | ≤ 2                                 |
| Higher Heating Value, (MJ/kg), db                | 20                                  |                                 |                               |                                  |                             | ≥ 16                 | ≥ 16                | ≥ 16             |        |                                     |
| Bulk Density (kg/L), ar                          | 0.31 – 0.79                         |                                 |                               |                                  |                             |                      | ≥ 0.12              |                  |        |                                     |
| Mean Particle Diameter, d <sub>50</sub> (mm), ar | 2.4 <sup>†</sup> – 7.3 <sup>†</sup> |                                 |                               |                                  |                             |                      | ≤ 80                | ≤ 2              |        | ≤ 10                                |
| Hydrogen / Carbon ratio                          | 0.09 – 0.10                         |                                 |                               |                                  |                             |                      |                     |                  |        | 0.08 – 0.15                         |
| PRODUCTS →                                       |                                     | Biodiesel                       | Biogas                        | Bio-Ethanol                      | Bio-Hydrogen                | Electricity and Heat | Syngas              | Bio-oils         |        |                                     |
| Samples admissibility as received ⇨              |                                     | ✗                               | ✓                             | ✓                                | ✓                           | ✗                    | ✗                   | ✗                | ✗      | ✓                                   |

<sup>†</sup>, values determined in pre-dried samples

| 2 <sup>nd</sup> step                                             |  | Criteria to be satisfied after eventual adjustments of moisture* and particle dimension** |   |   |   |                          |                        |                        |                          |                          |
|------------------------------------------------------------------|--|-------------------------------------------------------------------------------------------|---|---|---|--------------------------|------------------------|------------------------|--------------------------|--------------------------|
| Total moisture, % (w/w), after adjustment *                      |  |                                                                                           |   |   |   | ≤ 40                     | ≤ 20                   | ≤ 20                   | ≤ 20                     | 50 – 80                  |
| R <sub>M</sub> = Total moisture, ar / Total moisture, adjusted * |  |                                                                                           |   |   |   | 1 < R <sub>M</sub> ≤ 1.5 | 1 < R <sub>M</sub> ≤ 3 | 1 < R <sub>M</sub> ≤ 3 | 1 < R <sub>M</sub> ≤ 2.5 | 0.6 ≤ R <sub>M</sub> < 1 |
| Mean Particle Diameter, d <sub>50</sub> (mm), ar                 |  |                                                                                           |   |   |   |                          | ≤ 80                   | ≤ 2                    |                          | ≤ 10                     |
| Samples admissibility after adjustment ⇨                         |  | ✗                                                                                         | ✓ | ✓ | ✓ | ✗                        | ✗                      | ✗                      | ✗                        | ✓                        |

\*, Natural drying (T5, T6, T7-Sol.), Decantation (T7-Liq.) or Humidification (T8); \*\*, Milling

**Figure S9.** Application of the Admissibility Grid to the organic fractions from industrial wastes, sludges, and by-products samples within the *Solid Residues and Thick Sludges* matrix: Chestnut shells (CS).



Solid residues and  
thick sludges

Carob pulp (CP)

CP

| 1 <sup>st</sup> step                                |         | TECHNOLOGIES →                  |                               |                                  |                             |                         |                     |                  |        |                                     |
|-----------------------------------------------------|---------|---------------------------------|-------------------------------|----------------------------------|-----------------------------|-------------------------|---------------------|------------------|--------|-------------------------------------|
|                                                     |         | T 1<br>Trans-<br>esterification | T 2<br>Anaerobic<br>Digestion | T 3<br>Alcoholic<br>Fermentation | T 4<br>Dark<br>Fermentation | T 5<br>Combustion       | T 6<br>Gasification | T 7<br>Pyrolysis |        | T 8<br>Hydrothermal<br>Liquefaction |
| Parameter                                           | Results |                                 |                               |                                  |                             |                         |                     | Solid            | Liquid |                                     |
| Total Moisture (% w/w), ar                          | 15      |                                 |                               |                                  |                             | ≤ 40                    | ≤ 20                | ≤ 20             | ≤ 20   | 50 – 80                             |
| Oil (% w/w), ar                                     | 0.35    | ≥ 40                            | ≤ 30                          |                                  |                             |                         |                     |                  | ≥ 30   |                                     |
| Kjeldahl Nitrogen (% w/w), ar                       | 0.44    |                                 | ≥ 0.01                        |                                  |                             |                         |                     |                  |        |                                     |
| Total Volatile Solids, (% w/w), ar                  | 83      |                                 | ≥ 0.5                         |                                  |                             |                         |                     |                  |        |                                     |
| Carbon / Nitrogen ratio                             | 79      |                                 | 10 – 60                       |                                  |                             |                         |                     |                  |        |                                     |
| Total Hydrolysed Sugars<br>(as glucose) (% w/w), db | 29      |                                 |                               | ≥ 20                             | ≥ 25                        |                         |                     |                  |        |                                     |
| Ash at 815 °C (% w/w), db                           | 2.4     |                                 |                               |                                  |                             | ≤ 20                    | ≤ 20                | ≤ 20             |        | ≤ 20                                |
| Total Chloride (% w/w), db                          | < 0.14  |                                 |                               |                                  |                             | ≤ 1                     | ≤ 1                 | ≤ 1              |        | ≤ 1                                 |
| Total Sulphur (% w/w), db                           | < 0.03  |                                 |                               |                                  |                             | ≤ 2                     | ≤ 2                 | ≤ 2              |        | ≤ 2                                 |
| Higher Heating Value, (MJ/kg), db                   | 18      |                                 |                               |                                  |                             | ≥ 16                    | ≥ 16                | ≥ 16             |        |                                     |
| Bulk Density (kg/L), ar                             | 0.51    |                                 |                               |                                  |                             |                         | ≥ 0.12              |                  |        |                                     |
| Mean Particle Diameter, d <sub>50</sub> (mm), ar    | 5.4     |                                 |                               |                                  |                             |                         | ≤ 80                | ≤ 2              |        | ≤ 10                                |
| Hydrogen / Carbon ratio                             | 0.09    |                                 |                               |                                  |                             |                         |                     |                  |        | 0.08 – 0.15                         |
| PRODUCTS →                                          |         | Biodiesel                       | Biogas                        | Bio-Ethanol                      | Bio-Hydrogen                | Electricity<br>and Heat | Syngas              | Bio-oils         |        |                                     |
| Samples admissibility as received ⇨                 |         | ✗                               | ✗                             | ✓                                | ✓                           | ✓                       | ✓                   | ✗                | ✗      | ✗                                   |

| 2 <sup>nd</sup> step                                             |  | Criteria to be satisfied after eventual adjustments of moisture* and particle dimension** |   |   |   |                          |                        |                        |                          |                          |
|------------------------------------------------------------------|--|-------------------------------------------------------------------------------------------|---|---|---|--------------------------|------------------------|------------------------|--------------------------|--------------------------|
| Total moisture, % (w/w), after adjustment *                      |  |                                                                                           |   |   |   | ≤ 40                     | ≤ 20                   | ≤ 20                   | ≤ 20                     | 50 – 80                  |
| R <sub>M</sub> = Total moisture, ar / Total moisture, adjusted * |  |                                                                                           |   |   |   | 1 < R <sub>M</sub> ≤ 1.5 | 1 < R <sub>M</sub> ≤ 3 | 1 < R <sub>M</sub> ≤ 3 | 1 < R <sub>M</sub> ≤ 2.5 | 0.6 ≤ R <sub>M</sub> < 1 |
| Mean Particle Diameter, d <sub>50</sub> (mm), ar                 |  |                                                                                           |   |   |   |                          | ≤ 80                   | ≤ 2                    |                          | ≤ 10                     |
| Samples admissibility after adjustment ⇨                         |  | ✗                                                                                         | ✗ | ✓ | ✓ | ✓                        | ✓                      | ✓                      | ✗                        | ✗                        |

\*, Natural drying (T5, T6, T7-Sol.), Decantation (T7-Liq.) or Humidification (T8); \*\*, Milling

**Figure S10.** Application of the Admissibility Grid to the organic fractions from industrial wastes, sludges, and by-products samples within the *Solid Residues and Thick Sludges* matrix: Carob pulp (CP).

Solid residues and thick sludges

Grape marc (GM)

GM

| 1 <sup>st</sup> step                             |         | TECHNOLOGIES →                  |                               |                                  |                             |                      |                     |                  |        |                                     |
|--------------------------------------------------|---------|---------------------------------|-------------------------------|----------------------------------|-----------------------------|----------------------|---------------------|------------------|--------|-------------------------------------|
| Parameter                                        | Results | T 1<br>Trans-<br>esterification | T 2<br>Anaerobic<br>Digestion | T 3<br>Alcoholic<br>Fermentation | T 4<br>Dark<br>Fermentation | T 5<br>Combustion    | T 6<br>Gasification | T 7<br>Pyrolysis |        | T 8<br>Hydrothermal<br>Liquefaction |
|                                                  |         |                                 |                               |                                  |                             |                      |                     | Solid            | Liquid |                                     |
| Total Moisture (% w/w), ar                       | 8.4     |                                 |                               |                                  |                             | ≤ 40                 | ≤ 20                | ≤ 20             | ≤ 20   | 50 – 80                             |
| Oil (% w/w), ar                                  | 4.2     | ≥ 40                            | ≤ 30                          |                                  |                             |                      |                     |                  | ≥ 30   |                                     |
| Kjeldahl Nitrogen (% w/w), ar                    | 1.8     |                                 | ≥ 0.01                        |                                  |                             |                      |                     |                  |        |                                     |
| Total Volatile Solids, (% w/w), ar               | 85      |                                 | ≥ 0.5                         |                                  |                             |                      |                     |                  |        |                                     |
| Carbon / Nitrogen ratio                          | 26      |                                 | 10 – 60                       |                                  |                             |                      |                     |                  |        |                                     |
| Total Hydrolysed Sugars (as glucose) (% w/w), db | 21      |                                 |                               | ≥ 20                             | ≥ 25                        |                      |                     |                  |        |                                     |
| Ash at 815 °C (% w/w), db                        | 5.6     |                                 |                               |                                  |                             | ≤ 20                 | ≤ 20                | ≤ 20             |        | ≤ 20                                |
| Total Chloride (% w/w), db                       | < 0.14  |                                 |                               |                                  |                             | ≤ 1                  | ≤ 1                 | ≤ 1              |        | ≤ 1                                 |
| Total Sulphur (% w/w), db                        | < 0.03  |                                 |                               |                                  |                             | ≤ 2                  | ≤ 2                 | ≤ 2              |        | ≤ 2                                 |
| Higher Heating Value, (MJ/kg), db                | 21      |                                 |                               |                                  |                             | ≥ 16                 | ≥ 16                | ≥ 16             |        |                                     |
| Bulk Density (kg/L), ar                          | 0.28    |                                 |                               |                                  |                             |                      | ≥ 0.12              |                  |        |                                     |
| Mean Particle Diameter, d <sub>50</sub> (mm), ar | 2.7     |                                 |                               |                                  |                             |                      | ≤ 80                | ≤ 2              |        | ≤ 10                                |
| Hydrogen / Carbon ratio                          | 0.11    |                                 |                               |                                  |                             |                      |                     |                  |        | 0.08 – 0.15                         |
| PRODUCTS →                                       |         | Biodiesel                       | Biogas                        | Bio-Ethanol                      | Bio-Hydrogen                | Electricity and Heat | Syngas              | Bio-oils         |        |                                     |
| Samples admissibility as received ⇨              |         | ✗                               | ✓                             | ✓                                | ✗                           | ✓                    | ✓                   | ✗                | ✗      | ✗                                   |

| 2 <sup>nd</sup> step                                             |  | Criteria to be satisfied after eventual adjustments of moisture* and particle dimension** |   |   |   |                          |                        |                        |                          |                          |
|------------------------------------------------------------------|--|-------------------------------------------------------------------------------------------|---|---|---|--------------------------|------------------------|------------------------|--------------------------|--------------------------|
| Total moisture, % (w/w), after adjustment *                      |  |                                                                                           |   |   |   | ≤ 40                     | ≤ 20                   | ≤ 20                   | ≤ 20                     | 50 – 80                  |
| R <sub>M</sub> = Total moisture, ar / Total moisture, adjusted * |  |                                                                                           |   |   |   | 1 < R <sub>M</sub> ≤ 1.5 | 1 < R <sub>M</sub> ≤ 3 | 1 < R <sub>M</sub> ≤ 3 | 1 < R <sub>M</sub> ≤ 2.5 | 0.6 ≤ R <sub>M</sub> < 1 |
| Mean Particle Diameter, d <sub>50</sub> (mm), ar                 |  |                                                                                           |   |   |   |                          | ≤ 80                   | ≤ 2                    |                          | ≤ 10                     |
| Samples admissibility after adjustment ⇨                         |  | ✗                                                                                         | ✓ | ✓ | ✗ | ✓                        | ✓                      | ✓                      | ✗                        | ✗                        |

\*, Natural drying (T5, T6, T7-Sol.), Decantation (T7-Liq.) or Humidification (T8); \*\*, Milling

**Figure S11.** Application of the Admissibility Grid to the organic fractions from industrial wastes, sludges, and by-products samples within the *Solid Residues and Thick Sludges* matrix: Grape marc (GM).

Solid residues and thick sludges

Tomato pomace (TP)

TP1

TP2

| 1 <sup>st</sup> step                                |                     | TECHNOLOGIES →                  |                               |                                  |                             |                         |                     |                  |        |                                     |
|-----------------------------------------------------|---------------------|---------------------------------|-------------------------------|----------------------------------|-----------------------------|-------------------------|---------------------|------------------|--------|-------------------------------------|
| Parameter                                           | Results             | T 1<br>Trans-<br>esterification | T 2<br>Anaerobic<br>Digestion | T 3<br>Alcoholic<br>Fermentation | T 4<br>Dark<br>Fermentation | T 5<br>Combustion       | T 6<br>Gasification | T 7<br>Pyrolysis |        | T 8<br>Hydrothermal<br>Liquefaction |
|                                                     |                     |                                 |                               |                                  |                             |                         |                     | Solid            | Liquid |                                     |
| Total Moisture (% w/w), ar                          | 60 – 94             |                                 |                               |                                  |                             | ≤ 40                    | ≤ 20                | ≤ 20             | ≤ 20   | 50 – 80                             |
| Oil (% w/w), ar                                     | 1.8 – 2.1           | ≥ 40                            | ≤ 30                          |                                  |                             |                         |                     |                  | ≥ 30   |                                     |
| Kjeldahl Nitrogen (% w/w), ar                       | 0.58 – 1.7          |                                 | ≥ 0.01                        |                                  |                             |                         |                     |                  |        |                                     |
| Total Volatile Solids, (% w/w), ar                  | 6.0 – 40            |                                 | ≥ 0.5                         |                                  |                             |                         |                     |                  |        |                                     |
| Carbon / Nitrogen ratio                             | 18 <sup>†</sup>     |                                 | 10 – 60                       |                                  |                             |                         |                     |                  |        |                                     |
| Total Hydrolysed Sugars<br>(as glucose) (% w/w), db | 13 – 58             |                                 |                               | ≥ 20                             | ≥ 25                        |                         |                     |                  |        |                                     |
| Ash at 815 °C (% w/w), db                           | 0.20 – 2.5          |                                 |                               |                                  |                             | ≤ 20                    | ≤ 20                | ≤ 20             |        | ≤ 20                                |
| Total Chloride (% w/w), db                          | < 0.14 <sup>†</sup> |                                 |                               |                                  |                             | ≤ 1                     | ≤ 1                 | ≤ 1              |        | ≤ 1                                 |
| Total Sulphur (% w/w), db                           | 0.13 <sup>†</sup>   |                                 |                               |                                  |                             | ≤ 2                     | ≤ 2                 | ≤ 2              |        | ≤ 2                                 |
| Higher Heating Value, (MJ/kg), db                   | 25 <sup>†</sup>     |                                 |                               |                                  |                             | ≥ 16                    | ≥ 16                | ≥ 16             |        |                                     |
| Bulk Density (kg/L), ar                             | 0.43 – 1.0          |                                 |                               |                                  |                             |                         | ≥ 0.12              |                  |        |                                     |
| Mean Particle Diameter, d <sub>50</sub> (mm), ar    | 2.8 <sup>††</sup>   |                                 |                               |                                  |                             |                         | ≤ 80                | ≤ 2              |        | ≤ 10                                |
| Hydrogen / Carbon ratio                             | 0.13 <sup>†</sup>   |                                 |                               |                                  |                             |                         |                     |                  |        | 0.08 – 0.15                         |
| PRODUCTS →                                          |                     | Biodiesel                       | Biogas                        | Bio-Ethanol                      | Bio-Hydrogen                | Electricity<br>and Heat | Syngas              | Bio-oils         |        |                                     |
| Samples admissibility as received ⇨                 |                     | ✗                               | ✓                             | ✓                                | ✓                           | ✗                       | ✗                   | ✗                | ✗      | ✓                                   |

†, values determined in pre-dried samples

†, analysed only in one sample

| 2 <sup>nd</sup> step                                             |  | Criteria to be satisfied after eventual adjustments of moisture* and particle dimension** |   |   |   |                          |                        |                        |                          |                          |
|------------------------------------------------------------------|--|-------------------------------------------------------------------------------------------|---|---|---|--------------------------|------------------------|------------------------|--------------------------|--------------------------|
| Total moisture, % (w/w), after adjustment *                      |  |                                                                                           |   |   |   | ≤ 40                     | ≤ 20                   | ≤ 20                   | ≤ 20                     | 50 – 80                  |
| R <sub>M</sub> = Total moisture, ar / Total moisture, adjusted * |  |                                                                                           |   |   |   | 1 < R <sub>M</sub> ≤ 1.5 | 1 < R <sub>M</sub> ≤ 3 | 1 < R <sub>M</sub> ≤ 3 | 1 < R <sub>M</sub> ≤ 2.5 | 0.6 ≤ R <sub>M</sub> < 1 |
| Mean Particle Diameter, d <sub>50</sub> (mm), ar                 |  |                                                                                           |   |   |   |                          | ≤ 80                   | ≤ 2                    |                          | • ≤ 10                   |
| Samples admissibility after adjustment ⇨                         |  | ✗                                                                                         | ✓ | ✓ | ✓ | ✓                        | ✓                      | ✓                      | ✗                        | ✓                        |

\*, Natural drying (T5, T6, T7-Sol.), Decantation (T7-Liq.) or Humidification (T8); \*\*, Milling

**Figure S12.** Application of the Admissibility Grid to the organic fractions from industrial wastes, sludges, and by-products samples within the *Solid Residues and Thick Sludges* matrix: Tomato pomace (TP).

Solid residues and  
thick sludges

## IWWTP sludge from tomato processing (TS)

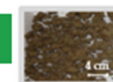

TS

| 1 <sup>st</sup> step TECHNOLOGIES →                 |         | T 1<br>Trans-<br>esterification | T 2<br>Anaerobic<br>Digestion | T 3<br>Alcoholic<br>Fermentation | T 4<br>Dark<br>Fermentation | T 5<br>Combustion       | T 6<br>Gasification | T 7<br>Pyrolysis |        | T 8<br>Hydrothermal<br>Liquefaction |
|-----------------------------------------------------|---------|---------------------------------|-------------------------------|----------------------------------|-----------------------------|-------------------------|---------------------|------------------|--------|-------------------------------------|
| Parameter                                           | Results |                                 |                               |                                  |                             |                         |                     | Solid            | Liquid |                                     |
| Total Moisture (% w/w), ar                          | 55      |                                 |                               |                                  |                             | ≤ 40                    | ≤ 20                | ≤ 20             | ≤ 20   | 50 – 80                             |
| Oil (% w/w), ar                                     | 0.12    | ≥ 40                            | ≤ 30                          |                                  |                             |                         |                     |                  | ≥ 30   |                                     |
| Kjeldahl Nitrogen (% w/w), ar                       | 0.91    |                                 | ≥ 0.01                        |                                  |                             |                         |                     |                  |        |                                     |
| Total Volatile Solids, (% w/w), ar                  | 6.3     |                                 | ≥ 0.5                         |                                  |                             |                         |                     |                  |        |                                     |
| Carbon / Nitrogen ratio                             | 5.8     |                                 | 10 – 60                       |                                  |                             |                         |                     |                  |        |                                     |
| Total Hydrolysed Sugars<br>(as glucose) (% w/w), db | 1.2     |                                 |                               | ≥ 20                             | ≥ 25                        |                         |                     |                  |        |                                     |
| Ash at 815 °C (% w/w), db                           | 84      |                                 |                               |                                  |                             | ≤ 20                    | ≤ 20                | ≤ 20             |        | ≤ 20                                |
| Total Chloride (% w/w), db                          | n.a.    |                                 |                               |                                  |                             | ≤ 1                     | ≤ 1                 | ≤ 1              |        | ≤ 1                                 |
| Total Sulphur (% w/w), db                           | n.a.    |                                 |                               |                                  |                             | ≤ 2                     | ≤ 2                 | ≤ 2              |        | ≤ 2                                 |
| Higher Heating Value, (MJ/kg), db                   | n.a.    |                                 |                               |                                  |                             | ≥ 16                    | ≥ 16                | ≥ 16             |        |                                     |
| Bulk Density (kg/L), ar                             | 0.12    |                                 |                               |                                  |                             |                         | ≥ 0.12              |                  |        |                                     |
| Mean Particle Diameter, d <sub>50</sub> (mm), ar    | --      |                                 |                               |                                  |                             |                         | ≤ 80                | ≤ 2              |        | ≤ 10                                |
| Hydrogen / Carbon ratio                             | 0.18    |                                 |                               |                                  |                             |                         |                     |                  |        | 0.08 – 0.15                         |
| PRODUCTS →                                          |         | Biodiesel                       | Biogas                        | Bio-<br>Ethanol                  | Bio-<br>Hydrogen            | Electricity<br>and Heat | Syngas              | Bio-oils         |        |                                     |
| Samples admissibility as received ⇨                 |         | ✗                               | ✗                             | ✗                                | ✗                           | ✗                       | ✗                   | ✗                | ✗      | ✗                                   |

--, not analysed because the characteristics of the sample were outside the scope of the analytical procedure  
 n.a., not analysed because the sample was too inorganic to fall within the scope of the procedures

| 2 <sup>nd</sup> step Criteria to be satisfied after eventual adjustments of moisture* and particle dimension** |  |   |   |   |   |                          |                        |                        |                          |                          |
|----------------------------------------------------------------------------------------------------------------|--|---|---|---|---|--------------------------|------------------------|------------------------|--------------------------|--------------------------|
| Total moisture, % (w/w), after adjustment *                                                                    |  |   |   |   |   | ≤ 40                     | ≤ 20                   | ≤ 20                   | ≤ 20                     | 50 – 80                  |
| R <sub>M</sub> = Total moisture, ar / Total moisture, adjusted *                                               |  |   |   |   |   | 1 < R <sub>M</sub> ≤ 1.5 | 1 < R <sub>M</sub> ≤ 3 | 1 < R <sub>M</sub> ≤ 3 | 1 < R <sub>M</sub> ≤ 2.5 | 0.6 ≤ R <sub>M</sub> < 1 |
| Mean Particle Diameter, d <sub>50</sub> (mm), ar                                                               |  |   |   |   |   |                          | ≤ 80                   | ≤ 2                    |                          | ≤ 10                     |
| Samples admissibility after adjustment ⇨                                                                       |  | ✗ | ✗ | ✗ | ✗ | ✗                        | ✗                      | ✗                      | ✗                        | ✗                        |

\*, Natural drying (T5, T6, T7-Sol.), Decantation (T7-Liq.) or Humidification (T8); \*\*, Milling

**Figure S13.** Application of the Admissibility Grid to the organic fractions from industrial wastes, sludges, and by-products samples within the *Solid Residues and Thick Sludges* matrix: IWWTP sludge from tomato processing (TS).

Solid residues and  
thick sludges

## Residue from yogurt production (DR)

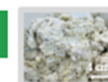

DR

| 1 <sup>st</sup> step                                |         | TECHNOLOGIES →                  |                               |                                  |                             |                         |                     |                  |        |                                    |
|-----------------------------------------------------|---------|---------------------------------|-------------------------------|----------------------------------|-----------------------------|-------------------------|---------------------|------------------|--------|------------------------------------|
|                                                     |         | T 1<br>Trans-<br>esterification | T 2<br>Anaerobic<br>Digestion | T 3<br>Alcoholic<br>Fermentation | T 4<br>Dark<br>Fermentation | T 5<br>Combustion       | T 6<br>Gasification | T 7<br>Pyrolysis |        | T 8<br>Hydrotherma<br>Liquefaction |
| Parameter                                           | Results |                                 |                               |                                  |                             |                         |                     | Solid            | Liquid |                                    |
| Total Moisture (% w/w), ar                          | 50      |                                 |                               |                                  |                             | ≤ 40                    | ≤ 20                | ≤ 20             | ≤ 20   | 50 – 80                            |
| Oil (% w/w), ar                                     | 40      | ≥ 40                            | ≤ 30                          |                                  |                             |                         |                     |                  | ≥ 30   |                                    |
| Kjeldahl Nitrogen (% w/w), ar                       | 0.20    |                                 | ≥ 0.01                        |                                  |                             |                         |                     |                  |        |                                    |
| Total Volatile Solids, (% w/w), ar                  | 50      |                                 | ≥ 0.5                         |                                  |                             |                         |                     |                  |        |                                    |
| Carbon / Nitrogen ratio                             | -       |                                 | 10 – 60                       |                                  |                             |                         |                     |                  |        |                                    |
| Total Hydrolysed Sugars<br>(as glucose) (% w/w), db | 0.21    |                                 |                               | ≥ 20                             | ≥ 25                        |                         |                     |                  |        |                                    |
| Ash at 815 °C (% w/w), db                           | 0.28    |                                 |                               |                                  |                             | ≤ 20                    | ≤ 20                | ≤ 20             |        | ≤ 20                               |
| Total Chloride (% w/w), db                          | n.a.    |                                 |                               |                                  |                             | ≤ 1                     | ≤ 1                 | ≤ 1              |        | ≤ 1                                |
| Total Sulphur (% w/w), db                           | n.a.    |                                 |                               |                                  |                             | ≤ 2                     | ≤ 2                 | ≤ 2              |        | ≤ 2                                |
| Higher Heating Value, (MJ/kg), db                   | n.a.    |                                 |                               |                                  |                             | ≥ 16                    | ≥ 16                | ≥ 16             |        |                                    |
| Bulk Density (kg/L), ar                             | 0.76    |                                 |                               |                                  |                             |                         | ≥ 0.12              |                  |        |                                    |
| Mean Particle Diameter, d <sub>50</sub> (mm), ar    | --      |                                 |                               |                                  |                             |                         | ≤ 80                | ≤ 2              |        | ≤ 10                               |
| Hydrogen / Carbon ratio                             | -       |                                 |                               |                                  |                             |                         |                     |                  |        | 0.08 – 0.15                        |
| PRODUCTS →                                          |         | Biodiesel                       | Biogas                        | Bio-<br>Ethanol                  | Bio-<br>Hydrogen            | Electricity<br>and Heat | Syngas              | Bio-oils         |        |                                    |
| Samples admissibility as received ⇨                 |         | ✓                               | ✗                             | ✗                                | ✗                           | ✗                       | ✗                   | ✗                | ✗      | ✗                                  |

n.a., not analysed because the samples were too greasy or too inorganic to fall within the scope of the procedures  
-, ratios were not estimated because CHN analysis was not performed as the sample characteristics were outside the scope of the analytical procedure  
--, not analysed because the characteristics of the sample were outside the scope of the analytical procedure

| 2 <sup>nd</sup> step                                             |  | Criteria to be satisfied after eventual adjustments of moisture* and particle dimension** |   |   |   |                          |                        |                        |                          |                          |
|------------------------------------------------------------------|--|-------------------------------------------------------------------------------------------|---|---|---|--------------------------|------------------------|------------------------|--------------------------|--------------------------|
| Total moisture, % (w/w), after adjustment *                      |  |                                                                                           |   |   |   | ≤ 40                     | ≤ 20                   | ≤ 20                   | ≤ 20                     | 50 – 80                  |
| R <sub>M</sub> = Total moisture, ar / Total moisture, adjusted * |  |                                                                                           |   |   |   | 1 < R <sub>M</sub> ≤ 1.5 | 1 < R <sub>M</sub> ≤ 3 | 1 < R <sub>M</sub> ≤ 3 | 1 < R <sub>M</sub> ≤ 2.5 | 0.6 ≤ R <sub>M</sub> < 1 |
| Mean Particle Diameter, d <sub>50</sub> (mm), ar                 |  |                                                                                           |   |   |   |                          | ≤ 80                   | ≤ 2                    |                          | ≤ 10                     |
| Samples admissibility after adjustment ⇨                         |  | ✓                                                                                         | ✗ | ✗ | ✗ | ✗                        | ✗                      | ✗                      | ✓                        | ✗                        |

\*, Natural drying (T5, T6, T7-Sol.), Decantation (T7-Liq.) or Humidification (T8); \*\*, Milling

**Figure S14.** Application of the Admissibility Grid to the organic fractions from industrial wastes, sludges, and by-products samples within the *Solid Residues and Thick Sludges* matrix: Residue from yogurt production (DR).



Solid residues and  
thick sludges

IWWTP sludge from yogurt production (DS)

DS

| 1 <sup>st</sup> step                                |         | TECHNOLOGIES →                  |                               |                                  |                             |                         |                     |                  |        |                                     |
|-----------------------------------------------------|---------|---------------------------------|-------------------------------|----------------------------------|-----------------------------|-------------------------|---------------------|------------------|--------|-------------------------------------|
|                                                     |         | T 1<br>Trans-<br>esterification | T 2<br>Anaerobic<br>Digestion | T 3<br>Alcoholic<br>Fermentation | T 4<br>Dark<br>Fermentation | T 5<br>Combustion       | T 6<br>Gasification | T 7<br>Pyrolysis |        | T 8<br>Hydrothermal<br>Liquefaction |
| Parameter                                           | Results |                                 |                               |                                  |                             |                         |                     | Solid            | Liquid |                                     |
| Total Moisture (% w/w), ar                          | 84      |                                 |                               |                                  |                             | ≤ 40                    | ≤ 20                | ≤ 20             | ≤ 20   | 50 – 80                             |
| Oil (% w/w), ar                                     | 7.0     | ≥ 40                            | ≤ 30                          |                                  |                             |                         |                     |                  | ≥ 30   |                                     |
| Kjeldahl Nitrogen (% w/w), ar                       | 0.84    |                                 | ≥ 0.01                        |                                  |                             |                         |                     |                  |        |                                     |
| Total Volatile Solids, (% w/w), ar                  | 16      |                                 | ≥ 0.5                         |                                  |                             |                         |                     |                  |        |                                     |
| Carbon / Nitrogen ratio                             | 12      |                                 | 10 - 60                       |                                  |                             |                         |                     |                  |        |                                     |
| Total Hydrolysed Sugars<br>(as glucose) (% w/w), db | 2.7     |                                 |                               | ≥ 20                             | ≥ 25                        |                         |                     |                  |        |                                     |
| Ash at 815 °C (% w/w), db                           | 4.1     |                                 |                               |                                  |                             | ≤ 20                    | ≤ 20                | ≤ 20             |        | ≤ 20                                |
| Total Chloride (% w/w), db                          | < 0.14  |                                 |                               |                                  |                             | ≤ 1                     | ≤ 1                 | ≤ 1              |        | ≤ 1                                 |
| Total Sulphur (% w/w), db                           | 0.32    |                                 |                               |                                  |                             | ≤ 2                     | ≤ 2                 | ≤ 2              |        | ≤ 2                                 |
| Higher Heating Value, (MJ/kg), db                   | 32      |                                 |                               |                                  |                             | ≥ 16                    | ≥ 16                | ≥ 16             |        |                                     |
| Bulk Density (kg/L), ar                             | 0.97    |                                 |                               |                                  |                             |                         | ≥ 0.12              |                  |        |                                     |
| Mean Particle Diameter, d <sub>50</sub> (mm), ar    | n.a.    |                                 |                               |                                  |                             |                         | ≤ 80                | ≤ 2              |        | ≤ 10                                |
| Hydrogen / Carbon ratio                             | 0.15    |                                 |                               |                                  |                             |                         |                     |                  |        | 0.08 – 0.15                         |
| PRODUCTS →                                          |         | Biodiesel                       | Biogas                        | Bio-Ethanol                      | Bio-Hydrogen                | Electricity<br>and Heat | Syngas              | Bio-oils         |        |                                     |
| Samples admissibility as received ⇨                 |         | ✗                               | ✓                             | ✗                                | ✗                           | ✗                       | ✗                   | ✗                | ✗      | ✗                                   |

n.a., not analysed because the samples were too greasy to fall within the scope of the procedures

| 2 <sup>nd</sup> step                                             |  | Criteria to be satisfied after eventual adjustments of moisture* and particle dimension** |   |   |   |                          |                        |                        |                          |                          |
|------------------------------------------------------------------|--|-------------------------------------------------------------------------------------------|---|---|---|--------------------------|------------------------|------------------------|--------------------------|--------------------------|
| Total moisture, % (w/w), after adjustment *                      |  |                                                                                           |   |   |   | ≤ 40                     | ≤ 20                   | ≤ 20                   | ≤ 20                     | 50 - 80                  |
| R <sub>M</sub> = Total moisture, ar / Total moisture, adjusted * |  |                                                                                           |   |   |   | 1 < R <sub>M</sub> ≤ 1.5 | 1 < R <sub>M</sub> ≤ 3 | 1 < R <sub>M</sub> ≤ 3 | 1 < R <sub>M</sub> ≤ 2.5 | 0.6 ≤ R <sub>M</sub> < 1 |
| Mean Particle Diameter, d <sub>50</sub> (mm), ar                 |  |                                                                                           |   |   |   |                          | ≤ 80                   | ≤ 2                    |                          | ≤ 10                     |
| Samples admissibility after adjustment ⇨                         |  | ✗                                                                                         | ✓ | ✗ | ✗ | ✗                        | ✗                      | ✗                      | ✗                        | ✗                        |

\*, Natural drying (T5, T6, T7-Sol.), Decantation (T7-Liq.) or Humidification (T8); \*\*, Milling

**Figure S15.** Application of the Admissibility Grid to the organic fractions from industrial wastes, sludges, and by-products samples within the *Solid Residues and Thick Sludges* matrix: IWWTP sludge from yogurt production (DS).



Solid residues and  
thick sludges

## IWWTP sludge from fruit processing (FPS)

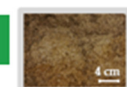

FPS

| 1 <sup>st</sup> step TECHNOLOGIES →                 |         | T 1<br>Trans-<br>esterification | T 2<br>Anaerobic<br>Digestion | T 3<br>Alcoholic<br>Fermentation | T 4<br>Dark<br>Fermentation | T 5<br>Combustion       | T 6<br>Gasification | T 7<br>Pyrolysis |        | T 8<br>Hydrothermal<br>Liquefaction |
|-----------------------------------------------------|---------|---------------------------------|-------------------------------|----------------------------------|-----------------------------|-------------------------|---------------------|------------------|--------|-------------------------------------|
| Parameter                                           | Results |                                 |                               |                                  |                             |                         |                     | Solid            | Liquid |                                     |
| Total Moisture (% w/w), ar                          | 91      |                                 |                               |                                  |                             | ≤ 40                    | ≤ 20                | ≤ 20             | ≤ 20   | 50 – 80                             |
| Oil (% w/w), ar                                     | 0.29    | ≥ 40                            | ≤ 30                          |                                  |                             |                         |                     |                  | ≥ 30   |                                     |
| Kjeldahl Nitrogen (% w/w), ar                       | 0.27    |                                 | ≥ 0.01                        |                                  |                             |                         |                     |                  |        |                                     |
| Total Volatile Solids, (% w/w), ar                  | 8.1     |                                 | ≥ 0.5                         |                                  |                             |                         |                     |                  |        |                                     |
| Carbon/ Nitrogen ratio                              | 10      |                                 | 10 - 60                       |                                  |                             |                         |                     |                  |        |                                     |
| Total Hydrolysed Sugars<br>(as glucose) (% w/w), db | 36      |                                 |                               | ≥ 20                             | ≥ 25                        |                         |                     |                  |        |                                     |
| Ash at 815 °C (% w/w), db                           | 8.2     |                                 |                               |                                  |                             | ≤ 20                    | ≤ 20                | ≤ 20             |        | ≤ 20                                |
| Total Chloride (% w/w), db                          | 0.18    |                                 |                               |                                  |                             | ≤ 1                     | ≤ 1                 | ≤ 1              |        | ≤ 1                                 |
| Total Sulphur (% w/w), db                           | 0.14    |                                 |                               |                                  |                             | ≤ 2                     | ≤ 2                 | ≤ 2              |        | ≤ 2                                 |
| Higher Heating Value, (MJ/kg), db                   | 21      |                                 |                               |                                  |                             | ≥ 16                    | ≥ 16                | ≥ 16             |        |                                     |
| Bulk Density (kg/L), ar                             | 0.96    |                                 |                               |                                  |                             |                         | ≥ 0.12              |                  |        |                                     |
| Mean Particle Diameter, d <sub>50</sub> (mm), ar    | --      |                                 |                               |                                  |                             |                         | ≤ 80                | ≤ 2              |        | ≤ 10                                |
| Hydrogen / Carbon ratio                             | 0.12    |                                 |                               |                                  |                             |                         |                     |                  |        | 0.08 – 0.15                         |
| PRODUCTS →                                          |         | Biodiesel                       | Biogas                        | Bio-<br>Ethanol                  | Bio-<br>Hydrogen            | Electricity<br>and Heat | Syngas              | Bio-oils         |        |                                     |
| Samples admissibility as received ⇨                 |         | ✗                               | ✓                             | ✓                                | ✓                           | ✗                       | ✗                   | ✗                | ✗      | ✗                                   |

--, not analysed because the characteristics of the sample were outside the scope of the analytical procedure

| 2 <sup>nd</sup> step Criteria to be satisfied after eventual adjustments of moisture* and particle dimension** |  |   |   |   |   |                          |                        |                        |                          |                          |
|----------------------------------------------------------------------------------------------------------------|--|---|---|---|---|--------------------------|------------------------|------------------------|--------------------------|--------------------------|
| Total moisture, % (w/w), after adjustment *                                                                    |  |   |   |   |   | ≤ 40                     | ≤ 20                   | ≤ 20                   | ≤ 20                     | 50 - 80                  |
| R <sub>M</sub> = Total moisture, ar / Total moisture, adjusted *                                               |  |   |   |   |   | 1 < R <sub>M</sub> ≤ 1.5 | 1 < R <sub>M</sub> ≤ 3 | 1 < R <sub>M</sub> ≤ 3 | 1 < R <sub>M</sub> ≤ 2.5 | 0.6 ≤ R <sub>M</sub> < 1 |
| Mean Particle Diameter, d <sub>50</sub> (mm), ar                                                               |  |   |   |   |   |                          | ≤ 80                   | ≤ 2                    |                          | ≤ 10                     |
| Samples admissibility after adjustment ⇨                                                                       |  | ✗ | ✓ | ✓ | ✓ | ✗                        | ✗                      | ✗                      | ✗                        | ✗                        |

\*, Natural drying (T5, T6, T7-Sol.), Decantation (T7-Liq.) or Humidification (T8); \*\*, Milling

**Figure S16.** Application of the Admissibility Grid to the organic fractions from industrial wastes, sludges, and by-products samples within the *Solid Residues and Thick Sludges* matrix: IWWTP sludge from fruit processing (FPS).

Solid residues and thick sludges

Poultry litter (PL)

PL1

PL2

| 1 <sup>st</sup> step                             |             | TECHNOLOGIES →                  |                               |                                  |                             |                      |                     |                  |        |                                     |
|--------------------------------------------------|-------------|---------------------------------|-------------------------------|----------------------------------|-----------------------------|----------------------|---------------------|------------------|--------|-------------------------------------|
|                                                  |             | T 1<br>Trans-<br>esterification | T 2<br>Anaerobic<br>Digestion | T 3<br>Alcoholic<br>Fermentation | T 4<br>Dark<br>Fermentation | T 5<br>Combustion    | T 6<br>Gasification | T 7<br>Pyrolysis |        | T 8<br>Hydrothermal<br>Liquefaction |
| Parameter                                        | Results     |                                 |                               |                                  |                             |                      |                     | Solid            | Liquid |                                     |
| Total Moisture (% w/w), ar                       | 29 - 64     |                                 |                               |                                  |                             | ≤ 40                 | ≤ 20                | ≤ 20             | ≤ 20   | 50 - 80                             |
| Oil (% w/w), ar                                  | 0.52 - 1.5  | ≥ 40                            | ≤ 30                          |                                  |                             |                      |                     |                  | ≥ 30   |                                     |
| Kjeldahl Nitrogen (% w/w), ar                    | 1.6         |                                 | ≥ 0.01                        |                                  |                             |                      |                     |                  |        |                                     |
| Total Volatile Solids, (% w/w), ar               | 29 - 60     |                                 | ≥ 0.5                         |                                  |                             |                      |                     |                  |        |                                     |
| Carbon / Nitrogen ratio                          | 12 - 17     |                                 | 10 - 60                       |                                  |                             |                      |                     |                  |        |                                     |
| Total Hydrolysed Sugars (as glucose) (% w/w), db | 42 - 45     |                                 |                               | ≥ 20                             | ≥ 25                        |                      |                     |                  |        |                                     |
| Ash at 815 °C (% w/w), db                        | 14 - 19     |                                 |                               |                                  |                             | ≤ 20                 | ≤ 20                | ≤ 20             |        | ≤ 20                                |
| Total Chloride (% w/w), db                       | 0.37 - 0.50 |                                 |                               |                                  |                             | ≤ 1                  | ≤ 1                 | ≤ 1              |        | ≤ 1                                 |
| Total Sulphur (% w/w), db                        | 0.29 - 0.39 |                                 |                               |                                  |                             | ≤ 2                  | ≤ 2                 | ≤ 2              |        | ≤ 2                                 |
| Higher Heating Value, (MJ/kg), db                | 15 - 17     |                                 |                               |                                  |                             | ≥ 16                 | ≥ 16                | ≥ 16             |        |                                     |
| Bulk Density (kg/L), ar                          | 0.25 - 0.59 |                                 |                               |                                  |                             |                      | ≥ 0.12              |                  |        |                                     |
| Mean Particle Diameter, d <sub>50</sub> (mm), ar | --          |                                 |                               |                                  |                             |                      | ≤ 80                | ≤ 2              |        | ≤ 10                                |
| Hydrogen / Carbon ratio                          | 0.12        |                                 |                               |                                  |                             |                      |                     |                  |        | 0.08 - 0.15                         |
| PRODUCTS →                                       |             | Biodiesel                       | Biogas                        | Bio-Ethanol                      | Bio-Hydrogen                | Electricity and Heat | Syngas              | Bio-oils         |        |                                     |
| Samples admissibility as received ⇨              |             | ✗                               | ✓                             | ✓                                | ✓                           | ✗                    | ✗                   | ✗                | ✗      | ✗                                   |

--, not analysed because the characteristics of the sample were outside the scope of the analytical procedure

| 2 <sup>nd</sup> step                                             |  | Criteria to be satisfied after eventual adjustments of moisture* and particle dimension** |   |   |   |                          |                        |                        |                          |                          |
|------------------------------------------------------------------|--|-------------------------------------------------------------------------------------------|---|---|---|--------------------------|------------------------|------------------------|--------------------------|--------------------------|
| Total moisture, % (w/w), after adjustment *                      |  |                                                                                           |   |   |   | ≤ 40                     | ≤ 20                   | ≤ 20                   | ≤ 20                     | 50 - 80                  |
| R <sub>M</sub> = Total moisture, ar / Total moisture, adjusted * |  |                                                                                           |   |   |   | 1 < R <sub>M</sub> ≤ 1.5 | 1 < R <sub>M</sub> ≤ 3 | 1 < R <sub>M</sub> ≤ 3 | 1 < R <sub>M</sub> ≤ 2.5 | 0.6 ≤ R <sub>M</sub> < 1 |
| Mean Particle Diameter, d <sub>50</sub> (mm), ar                 |  |                                                                                           |   |   |   |                          | ≤ 80                   | ≤ 2                    |                          | ≤ 10                     |
| Samples admissibility after adjustment ⇨                         |  | ✗                                                                                         | ✓ | ✓ | ✓ | ✗                        | ✗                      | ✗                      | ✗                        | ✓                        |

\*, Natural drying (T5, T6, T7-Sol.), Decantation (T7-Liq.) or Humidification (T8); \*\*, Milling

**Figure S17.** Application of the Admissibility Grid to the organic fractions from industrial wastes, sludges, and by-products samples within the *Solid Residues and Thick Sludges* matrix: Poultry litter (PL).

Solid residues and  
thick sludges

## Primary sludge (PPS)

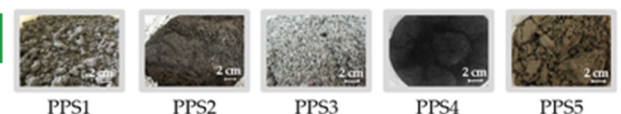

| 1 <sup>st</sup> step                                | TECHNOLOGIES →                      | T 1<br>Trans-<br>esterification | T 2<br>Anaerobic<br>Digestion | T 3<br>Alcoholic<br>Fermentation | T 4<br>Dark<br>Fermentation | T 5<br>Combustion       | T 6<br>Gasification | T 7<br>Pyrolysis | T 8<br>Hydrothermal<br>Liquefaction |
|-----------------------------------------------------|-------------------------------------|---------------------------------|-------------------------------|----------------------------------|-----------------------------|-------------------------|---------------------|------------------|-------------------------------------|
| Parameter                                           | Results                             |                                 |                               |                                  |                             |                         |                     | Solid<br>Liquid  |                                     |
| Total Moisture (% w/w), ar                          | 52 – 69                             |                                 |                               |                                  |                             | ≤ 40                    | ≤ 20                | ≤ 20             | 50 – 80                             |
| Oil (% w/w), ar                                     | 0.10 – 0.15                         | ≥ 40                            | ≤ 30                          |                                  |                             |                         |                     |                  | ≥ 30                                |
| Kjeldahl Nitrogen (% w/w), ar                       | 0.03 – 1.1                          |                                 | ≥ 0.01                        |                                  |                             |                         |                     |                  |                                     |
| Total Volatile Solids, (% w/w), ar                  | 11 – 35                             |                                 | ≥ 0.5                         |                                  |                             |                         |                     |                  |                                     |
| Carbon / Nitrogen ratio                             | 6.9–1.3×10 <sup>2</sup>             |                                 | 10 – 60                       |                                  |                             |                         |                     |                  |                                     |
| Total Hydrolysed Sugars<br>(as glucose) (% w/w), db | 3.0 – 74                            |                                 |                               | ≥ 20                             | ≥ 25                        |                         |                     |                  |                                     |
| Ash at 815 °C (% w/w), db                           | 7.1 – 63                            |                                 |                               |                                  |                             | ≤ 20                    | ≤ 20                | ≤ 20             | ≤ 20                                |
| Total Chloride (% w/w), db                          | <0.14–0.16                          |                                 |                               |                                  |                             | ≤ 1                     | ≤ 1                 | ≤ 1              | ≤ 1                                 |
| Total Sulphur (% w/w), db                           | <0.03–0.20                          |                                 |                               |                                  |                             | ≤ 2                     | ≤ 2                 | ≤ 2              | ≤ 2                                 |
| Higher Heating Value, (MJ/kg), db                   | 5.6 – 15                            |                                 |                               |                                  |                             | ≥ 16                    | ≥ 16                | ≥ 16             |                                     |
| Bulk Density (kg/L), ar                             | 0.51 – 1.0                          |                                 |                               |                                  |                             |                         | ≥ 0.12              |                  |                                     |
| Mean Particle Diameter, d <sub>50</sub> (mm), ar    | 2.4 <sup>†</sup> – 4.7 <sup>†</sup> |                                 |                               |                                  |                             |                         | ≤ 80                | ≤ 2              | ≤ 10                                |
| Hydrogen / Carbon ratio                             | 0.08 – 0.12                         |                                 |                               |                                  |                             |                         |                     |                  | 0.08 – 0.15                         |
| PRODUCTS →                                          |                                     | Biodiesel                       | Biogas                        | Bio-Ethanol                      | Bio-Hydrogen                | Electricity<br>and Heat | Syngas              | Bio-oils         |                                     |
| Samples admissibility as received ⇨                 |                                     | ✗                               | ✓                             | ✓                                | ✓                           | ✗                       | ✗                   | ✗                | ✗                                   |

†, values determined in pre-dried samples

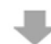

| 2 <sup>nd</sup> step                                             | Criteria to be satisfied after eventual adjustments of moisture* and particle dimension** |   |   |   |   |                          |                        |                        |                          |
|------------------------------------------------------------------|-------------------------------------------------------------------------------------------|---|---|---|---|--------------------------|------------------------|------------------------|--------------------------|
| Total moisture, % (w/w), after adjustment *                      |                                                                                           |   |   |   |   | ≤ 40                     | ≤ 20                   | ≤ 20                   | 50 – 80                  |
| R <sub>M</sub> = Total moisture, ar / Total moisture, adjusted * |                                                                                           |   |   |   |   | 1 < R <sub>M</sub> ≤ 1.5 | 1 < R <sub>M</sub> ≤ 3 | 1 < R <sub>M</sub> ≤ 3 | 0.6 ≤ R <sub>M</sub> < 1 |
| Mean Particle Diameter, d <sub>50</sub> (mm), ar                 |                                                                                           |   |   |   |   |                          | ≤ 80                   | ≤ 2                    | ≤ 10                     |
| Samples admissibility after adjustment ⇨                         |                                                                                           | ✗ | ✓ | ✓ | ✓ | ✗                        | ✗                      | ✗                      | ✓                        |

\*, Natural drying (T5, T6, T7-Sol.), Decantation (T7-Liq.) or Humidification (T8); \*\*, Milling

**Figure S18.** Application of the Admissibility Grid to the organic fractions from industrial wastes, sludges, and by-products samples within the *Solid Residues and Thick Sludges* matrix: Primary sludge (PPS).

Liquid sludges  
and fats

## Food waste hydrolysate for organic valorisation (FW)

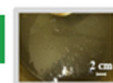

FW3

| 1 <sup>st</sup> step                                |         | TECHNOLOGIES ➡                          |         | T 1<br>Trans-<br>esterification | T 2<br>Anaerobic<br>Digestion | T 3<br>Alcoholic<br>Fermentation | T 4<br>Dark<br>Fermentation | T 5<br>Combustion | T 6<br>Gasification | T 7<br>Pyrolysis                         |        | T 8<br>Hydrothermal<br>Liquefaction |      |
|-----------------------------------------------------|---------|-----------------------------------------|---------|---------------------------------|-------------------------------|----------------------------------|-----------------------------|-------------------|---------------------|------------------------------------------|--------|-------------------------------------|------|
| Parameter                                           | Results |                                         |         |                                 |                               |                                  |                             |                   |                     | Solid                                    | Liquid |                                     |      |
| Total Moisture (% w/w), ar                          | 93      |                                         |         |                                 |                               |                                  |                             | ≤ 40              | ≤ 20                | Technology not applicable to this matrix | ≤ 20   | 50 – 80                             |      |
| Oil (kg/L), ar                                      | 0.02    | ≥ 0.30                                  | ≤ 0.25  |                                 |                               |                                  |                             |                   |                     |                                          | ≥ 0.25 |                                     |      |
| Kjeldahl Nitrogen, (g/L), ar                        | 3.1     |                                         | ≥ 0.10  |                                 |                               |                                  |                             |                   |                     |                                          |        |                                     |      |
| Total Volatile Solids, (kg/L), ar                   | 0.05    |                                         | ≥ 0.001 |                                 |                               |                                  |                             |                   |                     |                                          |        |                                     |      |
| Carbon / Nitrogen ratio                             | 11      |                                         | 10 – 60 |                                 |                               |                                  |                             |                   |                     |                                          |        |                                     |      |
| Total Hydrolysed Sugars<br>(as glucose) (% w/w), db | 6.8     |                                         |         | ≥ 20                            | ≥ 25                          |                                  |                             |                   |                     |                                          |        |                                     |      |
| Ash at 815 °C (% w/w), db                           | 24      |                                         |         |                                 |                               |                                  |                             | ≤ 20              | ≤ 20                |                                          |        |                                     | ≤ 20 |
| Total Chloride (% w/w), db                          | 1.6     |                                         |         |                                 |                               |                                  |                             | ≤ 1               | ≤ 1                 |                                          |        |                                     | ≤ 1  |
| Total Sulphur (% w/w), db                           | 0.81    |                                         |         |                                 |                               |                                  |                             | ≤ 2               | ≤ 2                 |                                          |        |                                     | ≤ 2  |
| Higher Heating Value, (MJ/kg), db                   | 22      |                                         |         |                                 |                               |                                  |                             | ≥ 16              | ≥ 16                |                                          |        |                                     |      |
| Bulk Density (kg/L), ar                             | 0.99    |                                         |         |                                 |                               |                                  |                             |                   | ≥ 0.12              |                                          |        |                                     |      |
| Mean Particle Diameter, d <sub>50</sub> (mm), ar    |         | Parameter not applicable to this matrix |         |                                 |                               |                                  |                             |                   |                     |                                          |        |                                     |      |
| Hydrogen / Carbon ratio                             | 0.15    |                                         |         |                                 |                               |                                  |                             |                   |                     |                                          |        | 0.08 – 0.15                         |      |
| PRODUCTS ➡                                          |         | Biodiesel                               | Biogas  | Bio-<br>Ethanol                 | Bio-<br>Hydrogen              | Electricity<br>and Heat          | Syngas                      | Bio-oils          |                     |                                          |        |                                     |      |
| Samples admissibility as received ➡                 |         | ✗                                       | ✓       | ✗                               | ✗                             | ✗                                | ✗                           | ✗                 |                     |                                          |        |                                     |      |

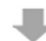

| 2 <sup>nd</sup> step                                             |  | Criteria to be satisfied after eventual adjustments of moisture* and particle dimension** |   |   |   |                          |                        |   |                          |                          |
|------------------------------------------------------------------|--|-------------------------------------------------------------------------------------------|---|---|---|--------------------------|------------------------|---|--------------------------|--------------------------|
| Total moisture, % (w/w), after adjustment *                      |  |                                                                                           |   |   |   | ≤ 40                     | ≤ 20                   |   | ≤ 20                     | 50 – 80                  |
| R <sub>M</sub> = Total moisture, ar / Total moisture, adjusted * |  |                                                                                           |   |   |   | 1 < R <sub>M</sub> ≤ 1.5 | 1 < R <sub>M</sub> ≤ 3 |   | 1 < R <sub>M</sub> ≤ 2.5 | 0.6 ≤ R <sub>M</sub> < 1 |
| Mean Particle Diameter, d <sub>50</sub> (mm), ar                 |  | Parameter not applicable to this matrix                                                   |   |   |   |                          |                        |   |                          |                          |
| Samples admissibility after adjustment ⇨                         |  | ✗                                                                                         | ✓ | ✗ | ✗ | ✗                        | ✗                      | ✗ |                          |                          |

\*, Natural drying (T5, T6, T7-Sol.), Decantation (T7-Liq.) or Humidification (T8); \*\*, Milling

**Figure S19.** Application of the Admissibility Grid to the organic fractions organic fractions of MSW, industrial wastes, sludges, and by-products samples within the *Liquid sludges and fats* matrix: Food waste hydrolysate for organic valorisation (FW).

Liquid sludges  
and fats

## Olive oil residual organic fraction with high fat content (OOF)

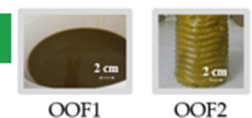

| 1 <sup>st</sup> step                             |             | TECHNOLOGIES ➡                                      |                                                     |                                                     |                                                     |                                                     |                                                     | T 7<br>Pyrolysis                                    |                                                     | T 8                                                 |         |        |      |         |      |     |     |
|--------------------------------------------------|-------------|-----------------------------------------------------|-----------------------------------------------------|-----------------------------------------------------|-----------------------------------------------------|-----------------------------------------------------|-----------------------------------------------------|-----------------------------------------------------|-----------------------------------------------------|-----------------------------------------------------|---------|--------|------|---------|------|-----|-----|
|                                                  |             | T 1<br>Trans-<br>esterification                     | T 2<br>Anaerobic<br>Digestion                       | T 3<br>Alcoholic<br>Fermentation                    | T 4<br>Dark<br>Fermentation                         | T 5<br>Combustion                                   | T 6<br>Gasification                                 | Solid                                               | Liquid                                              | Hydrothermal<br>Liquefaction                        |         |        |      |         |      |     |     |
| Parameter                                        | Results     | <div>Technology not applicable to this matrix</div> |         |        |      |         |      |     |     |
| Total Moisture (% w/w), ar                       | 9.6 – 13    |                                                     |                                                     |                                                     |                                                     |                                                     |                                                     |                                                     |                                                     |                                                     | ≤ 40    | ≤ 20   | ≤ 20 | 50 – 80 |      |     |     |
| Oil (kg/L), ar                                   | 0.46 – 0.76 |                                                     |                                                     |                                                     |                                                     |                                                     |                                                     |                                                     |                                                     |                                                     | ≥ 0.30  | ≤ 0.25 | ≥ 20 | ≥ 25    | ≤ 20 | ≤ 1 | ≤ 2 |
| Kjeldahl Nitrogen, (g/L), ar                     | 0.08 †      |                                                     |                                                     |                                                     |                                                     |                                                     |                                                     |                                                     |                                                     |                                                     | ≥ 0.10  | ≥ 16   | ≥ 16 |         |      |     |     |
| Total Volatile Solids, (kg/L), ar                | 0.81 – 0.86 |                                                     |                                                     |                                                     |                                                     |                                                     |                                                     |                                                     |                                                     |                                                     | ≥ 0.001 |        |      |         |      |     |     |
| Carbon / Nitrogen ratio                          | -           |                                                     |                                                     |                                                     |                                                     |                                                     |                                                     |                                                     |                                                     |                                                     | 10 – 60 |        |      |         |      |     |     |
| Total Hydrolysed Sugars (as glucose) (% w/w), db | 0.03 – 0.08 |                                                     |                                                     |                                                     |                                                     |                                                     |                                                     |                                                     |                                                     |                                                     |         |        |      |         |      |     |     |
| Ash at 815 °C (% w/w), db                        | 0.11 – 0.29 |                                                     |                                                     |                                                     |                                                     |                                                     |                                                     |                                                     |                                                     |                                                     |         |        |      |         |      |     |     |
| Total Chloride (% w/w), db                       | n.a.        |                                                     |                                                     |                                                     |                                                     |                                                     |                                                     |                                                     |                                                     |                                                     |         |        |      |         |      |     |     |
| Total Sulphur (% w/w), db                        | n.a.        |                                                     |                                                     |                                                     |                                                     |                                                     |                                                     |                                                     |                                                     |                                                     |         |        |      |         |      |     |     |
| Higher Heating Value, (MJ/kg), db                | n.a.        |                                                     |                                                     |                                                     |                                                     |                                                     |                                                     |                                                     |                                                     |                                                     |         |        |      |         |      |     |     |
| Bulk Density (kg/L), ar                          | 0.93 – 0.95 |                                                     |                                                     |                                                     |                                                     |                                                     | ≥ 0.12                                              |                                                     |                                                     |                                                     |         |        |      |         |      |     |     |
| Mean Particle Diameter, d <sub>50</sub> (mm), ar |             | Parameter not applicable to this matrix             |                                                     |                                                     |                                                     |                                                     |                                                     |                                                     |                                                     |                                                     |         |        |      |         |      |     |     |
| Hydrogen / Carbon ratio                          | -           |                                                     |                                                     |                                                     |                                                     |                                                     |                                                     |                                                     |                                                     | 0.08 – 0.15                                         |         |        |      |         |      |     |     |
| PRODUCTS ➡                                       |             | Biodiesel                                           | Biogas                                              | Bio-Ethanol                                         | Bio-Hydrogen                                        | Electricity and Heat                                | Syngas                                              | Bio-oils                                            |                                                     |                                                     |         |        |      |         |      |     |     |
| Samples admissibility as received ➡              |             | ✓                                                   | ✗                                                   | ✗                                                   | ✗                                                   | ✗                                                   | ✗                                                   | ✓                                                   | ✗                                                   | ✗                                                   |         |        |      |         |      |     |     |

-, ratios were not estimated because CHN analysis was not performed as the sample characteristics were outside the scope of the analytical procedure

†, analysed only in one sample

n.a., not analysed because the samples were too greasy to fall within the scope of the procedures

| 2 <sup>nd</sup> step                                             |  | Criteria to be satisfied after eventual adjustments of moisture* and particle dimension** |   |   |   |                        |                      |   |                        |                          |
|------------------------------------------------------------------|--|-------------------------------------------------------------------------------------------|---|---|---|------------------------|----------------------|---|------------------------|--------------------------|
| Total moisture, % (w/w), after adjustment *                      |  |                                                                                           |   |   |   | ≤ 40                   | ≤ 20                 |   | ≤ 20                   | 50 – 80                  |
| R <sub>M</sub> = Total moisture, ar / Total moisture, adjusted * |  |                                                                                           |   |   |   | 1<R <sub>M</sub> ≤ 1.5 | 1<R <sub>M</sub> ≤ 3 |   | 1<R <sub>M</sub> ≤ 2.5 | 0.6 ≤ R <sub>M</sub> < 1 |
| Mean Particle Diameter, d <sub>50</sub> (mm), ar                 |  | Parameter not applicable to this matrix                                                   |   |   |   |                        |                      |   |                        |                          |
| Samples admissibility after adjustment ⇨                         |  | ✓                                                                                         | ✗ | ✗ | ✗ | ✗                      | ✗                    | ✗ | ✓                      | ✗                        |

\*, Natural drying (T5, T6, T7-Sol.), Decantation (T7-Liq.) or Humidification (T8); \*\*, Milling

**Figure S20.** Application of the Admissibility Grid to the organic fractions organic fractions of MSW, industrial wastes, sludges, and by-products samples within the *Liquid sludges and fats* matrix: Olive oil residual organic fraction with high fat content (OOF).



Liquid sludges  
and fats

## IWWTP sludge from chestnut processing (CPS)

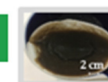

CPS

| 1 <sup>st</sup> step                             |         | TECHNOLOGIES →                          |                               |                                  |                             |                      |                     |                                          |        |                                     |
|--------------------------------------------------|---------|-----------------------------------------|-------------------------------|----------------------------------|-----------------------------|----------------------|---------------------|------------------------------------------|--------|-------------------------------------|
|                                                  |         | T 1<br>Trans-<br>esterification         | T 2<br>Anaerobic<br>Digestion | T 3<br>Alcoholic<br>Fermentation | T 4<br>Dark<br>Fermentation | T 5<br>Combustion    | T 6<br>Gasification | T 7<br>Pyrolysis                         |        | T 8<br>Hydrothermal<br>Liquefaction |
| Parameter                                        | Results |                                         |                               |                                  |                             |                      |                     | Solid                                    | Liquid |                                     |
| Total Moisture (% w/w), ar                       | 99      |                                         |                               |                                  |                             | ≤ 40                 | ≤ 20                | Technology not applicable to this matrix | ≤ 20   | 50 – 80                             |
| Oil (kg/L), ar                                   | < 0.01  | ≥ 0.30                                  | ≤ 0.25                        |                                  |                             |                      |                     |                                          | ≥ 0.25 |                                     |
| Kjeldahl Nitrogen, (g/L), ar                     | 0.22    |                                         | ≥ 0.10                        |                                  |                             |                      |                     |                                          |        |                                     |
| Total Volatile Solids, (kg/L), ar                | 0.01    |                                         | ≥ 0.001                       |                                  |                             |                      |                     |                                          |        |                                     |
| Carbon / Nitrogen ratio                          | 19      |                                         | 10 – 60                       |                                  |                             |                      |                     |                                          |        |                                     |
| Total Hydrolysed Sugars (as glucose) (% w/w), db | 18      |                                         |                               | ≥ 20                             | ≥ 25                        |                      |                     |                                          |        |                                     |
| Ash at 815 °C (% w/w), db                        | 7.0     |                                         |                               |                                  |                             | ≤ 20                 | ≤ 20                |                                          |        | ≤ 20                                |
| Total Chloride (% w/w), db                       | 0.35    |                                         |                               |                                  |                             | ≤ 1                  | ≤ 1                 |                                          |        | ≤ 1                                 |
| Total Sulphur (% w/w), db                        | 0.35    |                                         |                               |                                  |                             | ≤ 2                  | ≤ 2                 |                                          |        | ≤ 2                                 |
| Higher Heating Value, (MJ/kg), db                | 19      |                                         |                               |                                  |                             | ≥ 16                 | ≥ 16                |                                          |        |                                     |
| Bulk Density (kg/L), ar                          | 0.99    |                                         |                               |                                  |                             |                      | ≥ 0.12              |                                          |        |                                     |
| Mean Particle Diameter, d <sub>50</sub> (mm), ar |         | Parameter not applicable to this matrix |                               |                                  |                             |                      |                     |                                          |        |                                     |
| Hydrogen / Carbon ratio                          | 0.14    |                                         |                               |                                  |                             |                      |                     |                                          |        | 0.08 – 0.15                         |
| PRODUCTS →                                       |         | Biodiesel                               | Biogas                        | Bio-Ethanol                      | Bio-Hydrogen                | Electricity and Heat | Syngas              | Bio-oils                                 |        |                                     |
| Samples admissibility as received ⇨              |         | ✗                                       | ✓                             | ✗                                | ✗                           | ✗                    | ✗                   | ✗                                        | ✗      | ✗                                   |

| 2 <sup>nd</sup> step                                             |  | Criteria to be satisfied after eventual adjustments of moisture* and particle dimension** |   |   |   |                          |                        |   |                          |                          |
|------------------------------------------------------------------|--|-------------------------------------------------------------------------------------------|---|---|---|--------------------------|------------------------|---|--------------------------|--------------------------|
| Total moisture, % (w/w), after adjustment *                      |  |                                                                                           |   |   |   | ≤ 40                     | ≤ 20                   |   | ≤ 20                     | 50 – 80                  |
| R <sub>M</sub> = Total moisture, ar / Total moisture, adjusted * |  |                                                                                           |   |   |   | 1 < R <sub>M</sub> ≤ 1.5 | 1 < R <sub>M</sub> ≤ 3 |   | 1 < R <sub>M</sub> ≤ 2.5 | 0.6 ≤ R <sub>M</sub> < 1 |
| Mean Particle Diameter, d <sub>50</sub> (mm), ar                 |  | Parameter not applicable to this matrix                                                   |   |   |   |                          |                        |   |                          |                          |
| Samples admissibility after adjustment ⇨                         |  | ✗                                                                                         | ✓ | ✗ | ✗ | ✗                        | ✗                      | ✗ | ✗                        | ✗                        |

\*, Natural drying (T5, T6, T7-Sol.), Decantation (T7-Liq.) or Humidification (T8); \*\*, Milling

**Figure S21.** Application of the Admissibility Grid to the organic fractions organic fractions of MSW, industrial wastes, sludges, and by-products samples within the *Liquid sludges and fats* matrix: IWWTP sludge from chestnut processing (CPS).



Liquid sludges  
and fats

Wine lees (WL)

WL1

WL2

| 1 <sup>st</sup> step                                |             | TECHNOLOGIES →                          |                               |                                  |                             |                      |                     |                                          |        |                                     |  |  |  |
|-----------------------------------------------------|-------------|-----------------------------------------|-------------------------------|----------------------------------|-----------------------------|----------------------|---------------------|------------------------------------------|--------|-------------------------------------|--|--|--|
|                                                     |             | T 1<br>Trans-<br>esterification         | T 2<br>Anaerobic<br>Digestion | T 3<br>Alcoholic<br>Fermentation | T 4<br>Dark<br>Fermentation | T 5<br>Combustion    | T 6<br>Gasification | T 7<br>Pyrolysis                         |        | T 8<br>Hydrothermal<br>Liquefaction |  |  |  |
| Parameter                                           | Results     |                                         |                               |                                  |                             |                      |                     | Solid                                    | Liquid |                                     |  |  |  |
| Total Moisture (% w/w), ar                          | 90          |                                         |                               |                                  |                             | ≤ 40                 | ≤ 20                | Technology not applicable to this matrix | ≤ 20   | 50 – 80                             |  |  |  |
| Oil (kg/L), ar                                      | < 0.01      | ≥ 0.30                                  | ≤ 0.25                        |                                  |                             |                      |                     |                                          | ≥ 0.25 |                                     |  |  |  |
| Kjeldahl Nitrogen, (g/L), ar                        | 3.5 – 4.5   |                                         | ≥ 0.10                        |                                  |                             |                      |                     |                                          |        |                                     |  |  |  |
| Total Volatile Solids, (kg/L), ar                   | 0.07 – 0.08 |                                         | ≥ 0.001                       |                                  |                             |                      |                     |                                          |        |                                     |  |  |  |
| Carbon / Nitrogen ratio                             | 10 – 11     |                                         | 10 – 60                       |                                  |                             |                      |                     |                                          |        |                                     |  |  |  |
| Total Hydrolysed Sugars<br>(as glucose) (% w/w), db | 17 – 19     |                                         |                               | ≥ 20                             | ≥ 25                        |                      |                     |                                          |        |                                     |  |  |  |
| Ash at 815 °C (% w/w), db                           | 16 – 28     |                                         |                               |                                  |                             | ≤ 20                 | ≤ 20                |                                          |        | ≤ 20                                |  |  |  |
| Total Chloride (% w/w), db                          | n.a.*       |                                         |                               |                                  |                             | ≤ 1                  | ≤ 1                 |                                          |        | ≤ 1                                 |  |  |  |
| Total Sulphur (% w/w), db                           | n.a.*       |                                         |                               |                                  |                             | ≤ 2                  | ≤ 2                 |                                          |        | ≤ 2                                 |  |  |  |
| Higher Heating Value, (MJ/kg), db                   | n.a.*       |                                         |                               |                                  |                             | ≥ 16                 | ≥ 16                |                                          |        |                                     |  |  |  |
| Bulk Density (kg/L), ar                             | 1.0         |                                         |                               |                                  |                             |                      | ≥ 0.12              |                                          |        |                                     |  |  |  |
| Mean Particle Diameter, d <sub>50</sub> (mm), ar    |             | Parameter not applicable to this matrix |                               |                                  |                             |                      |                     |                                          |        |                                     |  |  |  |
| Hydrogen / Carbon ratio                             | 0.12 – 0.13 |                                         |                               |                                  |                             |                      |                     |                                          |        | 0.08 – 0.15                         |  |  |  |
| PRODUCTS →                                          |             | Biodiesel                               | Biogas                        | Bio-Ethanol                      | Bio-Hydrogen                | Electricity and Heat | Syngas              | Bio-oils                                 |        |                                     |  |  |  |
| Samples admissibility as received ⇨                 |             | ✗                                       | ✓                             | ✗                                | ✗                           | ✗                    | ✗                   | ✗ ✗                                      |        |                                     |  |  |  |

n.a.\*, not analysed since these samples were not expected to be used in technologies T5, T6, or T7

| 2 <sup>nd</sup> step                                             |  | Criteria to be satisfied after eventual adjustments of moisture* and particle dimension** |   |   |   |                          |                        |     |                          |                          |  |
|------------------------------------------------------------------|--|-------------------------------------------------------------------------------------------|---|---|---|--------------------------|------------------------|-----|--------------------------|--------------------------|--|
| Total moisture, % (w/w), after adjustment *                      |  |                                                                                           |   |   |   | ≤ 40                     | ≤ 20                   |     | ≤ 20                     | 50 – 80                  |  |
| R <sub>M</sub> = Total moisture, ar / Total moisture, adjusted * |  |                                                                                           |   |   |   | 1 < R <sub>M</sub> ≤ 1.5 | 1 < R <sub>M</sub> ≤ 3 |     | 1 < R <sub>M</sub> ≤ 2.5 | 0.6 ≤ R <sub>M</sub> < 1 |  |
| Mean Particle Diameter, d <sub>50</sub> (mm), ar                 |  | Parameter not applicable to this matrix                                                   |   |   |   |                          |                        |     |                          |                          |  |
| Samples admissibility after adjustment ⇨                         |  | ✗                                                                                         | ✓ | ✗ | ✗ | ✗                        | ✗                      | ✗ ✗ |                          |                          |  |

\*, Natural drying (T5, T6, T7-Sol.), Decantation (T7-Liq.) or Humidification (T8); \*\*, Milling

**Figure S22.** Application of the Admissibility Grid to the organic fractions organic fractions of MSW, industrial wastes, sludges, and by-products samples within the *Liquid sludges and fats* matrix: Wine lees (WL).

Liquid sludges  
and fats

Cheese whey (CW) and second cheese whey (SCW)

CW

SCW

| 1 <sup>st</sup> step                                |             | TECHNOLOGIES →                          |                               |                                  |                             |                      |                     |                                          |                |                                     |
|-----------------------------------------------------|-------------|-----------------------------------------|-------------------------------|----------------------------------|-----------------------------|----------------------|---------------------|------------------------------------------|----------------|-------------------------------------|
| Parameter                                           | Results     | T 1<br>Trans-<br>esterification         | T 2<br>Anaerobic<br>Digestion | T 3<br>Alcoholic<br>Fermentation | T 4<br>Dark<br>Fermentation | T 5<br>Combustion    | T 6<br>Gasification | T 7<br>Pyrolysis                         |                | T 8<br>Hydrothermal<br>Liquefaction |
| Total Moisture (% w/w), ar                          | 92 – 93     |                                         |                               |                                  |                             | ≤ 40                 | ≤ 20                | Technology not applicable to this matrix |                | 50 – 80                             |
| Oil (kg/L), ar                                      | < 0.01      | ≥ 0.30                                  | ≤ 0.25                        |                                  |                             |                      |                     |                                          | ≤ 20<br>≥ 0.25 |                                     |
| Kjeldahl Nitrogen, (g/L), ar                        | 0.91 – 2.0  |                                         | ≥ 0.10                        |                                  |                             |                      |                     |                                          |                |                                     |
| Total Volatile Solids, (kg/L), ar                   | 0.06 – 0.07 |                                         | ≥ 0.001                       |                                  |                             |                      |                     |                                          |                |                                     |
| Carbon/ Nitrogen ratio                              | -           |                                         | 10 – 60                       |                                  |                             |                      |                     |                                          |                |                                     |
| Total Hydrolysed Sugars<br>(as glucose) (% w/w), db | 37 – 64     |                                         |                               | ≥ 20                             | ≥ 25                        |                      |                     |                                          |                |                                     |
| Ash at 815 °C (% w/w), db                           | 7.1 – 15    |                                         |                               |                                  |                             | ≤ 20                 | ≤ 20                |                                          |                | ≤ 20                                |
| Total Chloride (% w/w), db                          | n.a.        |                                         |                               |                                  |                             | ≤ 1                  | ≤ 1                 |                                          |                | ≤ 1                                 |
| Total Sulphur (% w/w), db                           | n.a.        |                                         |                               |                                  |                             | ≤ 2                  | ≤ 2                 |                                          |                | ≤ 2                                 |
| Higher Heating Value, (MJ/kg), db                   | n.a.        |                                         |                               |                                  |                             | ≥ 16                 | ≥ 16                |                                          |                |                                     |
| Bulk Density (kg/L), ar                             | 1.0         |                                         |                               |                                  |                             |                      | ≥ 0.12              |                                          |                |                                     |
| Mean Particle Diameter, d <sub>50</sub> (mm), ar    |             | Parameter not applicable to this matrix |                               |                                  |                             |                      |                     |                                          |                |                                     |
| Hydrogen/ Carbon ratio                              | -           |                                         |                               |                                  |                             |                      |                     |                                          |                | 0.08 – 0.15                         |
| PRODUCTS →                                          |             | Biodiesel                               | Biogas                        | Bio-Ethanol                      | Bio-Hydrogen                | Electricity and Heat | Syngas              | Bio-oils                                 |                |                                     |
| Samples admissibility as received ⇨                 |             | ✗                                       | ✗                             | ✓                                | ✓                           | ✗                    | ✗                   | ✗                                        |                |                                     |

-, ratios were not estimated because CHN analysis was not performed as the sample characteristics were outside the scope of the analytical procedure  
n.a., not analysed because the samples were too aqueous to fall within the scope of the procedures

| 2 <sup>nd</sup> step                                             |  | Criteria to be satisfied after eventual adjustments of moisture* and particle dimension** |   |   |   |                          |                        |   |                          |                          |
|------------------------------------------------------------------|--|-------------------------------------------------------------------------------------------|---|---|---|--------------------------|------------------------|---|--------------------------|--------------------------|
| Total moisture, % (w/w), after adjustment *                      |  |                                                                                           |   |   |   | ≤ 40                     | ≤ 20                   |   | ≤ 20                     | 50 – 80                  |
| R <sub>M</sub> = Total moisture, ar / Total moisture, adjusted * |  |                                                                                           |   |   |   | 1 < R <sub>M</sub> ≤ 1.5 | 1 < R <sub>M</sub> ≤ 3 |   | 1 < R <sub>M</sub> ≤ 2.5 | 0.6 ≤ P <sub>M</sub> < 1 |
| Mean Particle Diameter, d <sub>50</sub> (mm), ar                 |  | Parameter not applicable to this matrix                                                   |   |   |   |                          |                        |   |                          |                          |
| Samples admissibility after adjustment ⇨                         |  | ✗                                                                                         | ✗ | ✓ | ✓ | ✗                        | ✗                      | ✗ |                          |                          |

\*, Natural drying (T5, T6, T7-Sol.), Decantation (T7-Liq.) or Humidification (T8); \*\*, Milling

**Figure S23.** Application of the Admissibility Grid to the organic fractions organic fractions of MSW, industrial wastes, sludges, and by-products samples within the *Liquid sludges and fats* matrix: Cheese whey (CW) and second cheese whey (SCW).

Liquid sludges  
and fats

Wastes from fruit processing (FPW)

FPW

| 1 <sup>st</sup> step                             |         | TECHNOLOGIES →                          |                               |                                  |                             |                      |                     |                                          |        |                                     |  |
|--------------------------------------------------|---------|-----------------------------------------|-------------------------------|----------------------------------|-----------------------------|----------------------|---------------------|------------------------------------------|--------|-------------------------------------|--|
|                                                  |         | T 1<br>Trans-<br>esterification         | T 2<br>Anaerobic<br>Digestion | T 3<br>Alcoholic<br>Fermentation | T 4<br>Dark<br>Fermentation | T 5<br>Combustion    | T 6<br>Gasification | T 7<br>Pyrolysis                         |        | T 8<br>Hydrothermal<br>Liquefaction |  |
| Parameter                                        | Results |                                         |                               |                                  |                             |                      |                     | Solid                                    | Liquid |                                     |  |
| Total Moisture (% w/w), ar                       | 82      |                                         |                               |                                  |                             | ≤ 40                 | ≤ 20                | Technology not applicable to this matrix | ≤ 20   | 50 – 80                             |  |
| Oil (kg/L), ar                                   | < 0.01  | ≥ 0.30                                  | ≤ 0.25                        |                                  |                             |                      |                     |                                          | ≥ 0.25 |                                     |  |
| Kjeldahl Nitrogen, (g/L), ar                     | 0.12    |                                         | ≥ 0.10                        |                                  |                             |                      |                     |                                          |        |                                     |  |
| Total Volatile Solids, (kg/L), ar                | 0.19    |                                         | ≥ 0.001                       |                                  |                             |                      |                     |                                          |        |                                     |  |
| Carbon / Nitrogen ratio                          | 58      |                                         | 10 – 60                       |                                  |                             |                      |                     |                                          |        |                                     |  |
| Total Hydrolysed Sugars (as glucose) (% w/w), db | 50      |                                         |                               | ≥ 20                             | ≥ 25                        |                      |                     |                                          |        |                                     |  |
| Ash at 815 °C (% w/w), db                        | 1.5     |                                         |                               |                                  |                             | ≤ 20                 | ≤ 20                |                                          |        | ≤ 20                                |  |
| Total Chloride (% w/w), db                       | n.a.*   |                                         |                               |                                  |                             | ≤ 1                  | ≤ 1                 |                                          |        | ≤ 1                                 |  |
| Total Sulphur (% w/w), db                        | n.a.*   |                                         |                               |                                  |                             | ≤ 2                  | ≤ 2                 |                                          |        | ≤ 2                                 |  |
| Higher Heating Value, (MJ/kg), db                | n.a.*   |                                         |                               |                                  |                             | ≥ 16                 | ≥ 16                |                                          |        |                                     |  |
| Bulk Density (kg/L), ar                          | 1.0     |                                         |                               |                                  |                             |                      | ≥ 0.12              |                                          |        |                                     |  |
| Mean Particle Diameter, d <sub>50</sub> (mm), ar |         | Parameter not applicable to this matrix |                               |                                  |                             |                      |                     |                                          |        |                                     |  |
| Hydrogen / Carbon ratio                          | 0.17    |                                         |                               |                                  |                             |                      |                     |                                          |        | 0.08 – 0.15                         |  |
| PRODUCTS →                                       |         | Biodiesel                               | Biogas                        | Bio-Ethanol                      | Bio-Hydrogen                | Electricity and Heat | Syngas              | Bio-oils                                 |        |                                     |  |
| Samples admissibility as received ⇨              |         | ✗                                       | ✓                             | ✓                                | ✓                           | ✗                    | ✗                   | ✗ ✗                                      |        |                                     |  |

n.a.\*, not analysed since these samples were not expected to be used in technologies T5, T6, or T7

| 2 <sup>nd</sup> step                                             |  | Criteria to be satisfied after eventual adjustments of moisture* and particle dimension** |                               |                                  |                             |                          |                        |                  |                          |                                     |
|------------------------------------------------------------------|--|-------------------------------------------------------------------------------------------|-------------------------------|----------------------------------|-----------------------------|--------------------------|------------------------|------------------|--------------------------|-------------------------------------|
|                                                                  |  | T 1<br>Trans-<br>esterification                                                           | T 2<br>Anaerobic<br>Digestion | T 3<br>Alcoholic<br>Fermentation | T 4<br>Dark<br>Fermentation | T 5<br>Combustion        | T 6<br>Gasification    | T 7<br>Pyrolysis |                          | T 8<br>Hydrothermal<br>Liquefaction |
| Total moisture, % (w/w), after adjustment *                      |  |                                                                                           |                               |                                  |                             | ≤ 40                     | ≤ 20                   |                  | ≤ 20                     | 50 – 80                             |
| R <sub>M</sub> = Total moisture, ar / Total moisture, adjusted * |  |                                                                                           |                               |                                  |                             | 1 < R <sub>M</sub> ≤ 1.5 | 1 < R <sub>M</sub> ≤ 3 |                  | 1 < R <sub>M</sub> ≤ 2.5 | 0.6 ≤ R <sub>M</sub> < 1            |
| Mean Particle Diameter, d <sub>50</sub> (mm), ar                 |  | Parameter not applicable to this matrix                                                   |                               |                                  |                             |                          |                        |                  |                          |                                     |
| Samples admissibility after adjustment ⇨                         |  | ✗                                                                                         | ✓                             | ✓                                | ✓                           | ✗                        | ✗                      | ✗ ✗              |                          |                                     |

\*, Natural drying (T5, T6, T7-Sol.), Decantation (T7-Liq.) or Humidification (T8); \*\*, Milling

**Figure S24.** Application of the Admissibility Grid to the organic fractions organic fractions of MSW, industrial wastes, sludges, and by-products samples within the *Liquid sludges and fats* matrix: Wastes from fruit processing (FPW).
